# Supplementary material
Source: PubMed Central journal article supplement (PMC8547049)
Supplement: 13063_2021_5662_MOESM3_ESM.pdf [file 13063_2021_5662_MOESM3_ESM.pdf]

## SWHSI-2 Trial

### Weekly Assessments - Monthly Case Report Form

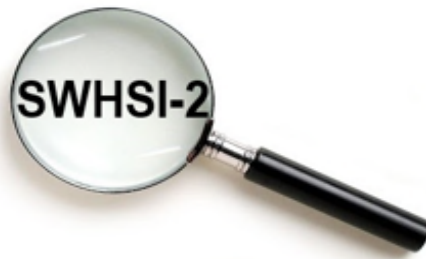

Site ID:

Participant ID:

This project is funded by the National Institute for Health Research Health Technology Assessment Programme (Project number 17/42/94)

### Instructions for Completion

An entry should be made in this CRF for every **completed** visit.

This CRF may be completed by the principal investigator or a delegated member of staff listed on the SWHSI-2 Trial Delegation Log. There are sufficient spaces to record four participant assessments.

Please refer to the associated SWHSI-2 Trial Specific Procedure for full details of how to complete this CRF.

Please complete all sections of this CRF using the spaces provided, and sign off when complete.

Please do not include any patient identifiable information when completing this CRF. When complete, please remove the staple and take a photocopy of the completed CRF for your site records. **Please do not re-staple the original.** Place the unstapled original in a "SWHSI-2 Trial business reply envelope" and send via post to York Trials Unit.

Participant ID: Visit Date:  /  /   
day month year**Section A – Clinical Events**

Please review any previous assessments and AE/SAE forms for ongoing events before completing this section.

Have any of the following events occurred since the last assessment?

**Section A1 – Wound Healing**

| Event                                                                                                         | Yes                      | No                       | Event Date (dd/mm/yyyy)                                            |
|---------------------------------------------------------------------------------------------------------------|--------------------------|--------------------------|--------------------------------------------------------------------|
| 1) Has healing of the reference SWHSI (confirmed by a healthcare professional) occurred since the last visit? | <input type="checkbox"/> | <input type="checkbox"/> | <input type="text"/> / <input type="text"/> / <input type="text"/> |
| a) If 'No', does the participant think their wound has healed?                                                | <input type="checkbox"/> | <input type="checkbox"/> |                                                                    |

**Section A2 – Clinical Events**

| Event                                                                                                                                        | Yes                      | No                       | Event Date (dd/mm/yyyy)                                                                             |
|----------------------------------------------------------------------------------------------------------------------------------------------|--------------------------|--------------------------|-----------------------------------------------------------------------------------------------------|
| 1) Did the participant have an infected SWHSI at the last assessment?<br>a) If 'Yes', has the infection resolved?                            | <input type="checkbox"/> | <input type="checkbox"/> | Date of Infection Resolution:<br><input type="text"/> / <input type="text"/> / <input type="text"/> |
| 2) Has the participant had a new SWHSI infection since their last assessment?<br>If 'Yes'...                                                 | <input type="checkbox"/> | <input type="checkbox"/> | Date of New Infection:<br><input type="text"/> / <input type="text"/> / <input type="text"/>        |
| a) Has a SWHSI-2 Trial Adverse Event form been completed?                                                                                    | <input type="checkbox"/> | <input type="checkbox"/> | Adverse Event Number <input type="text"/>                                                           |
| b) Has the new infection been resolved?                                                                                                      | <input type="checkbox"/> | <input type="checkbox"/> | Date of Infection Resolution:<br><input type="text"/> / <input type="text"/> / <input type="text"/> |
| 3) Was the patient an inpatient in relation to their SWHSI or SWHSI treatment at the last assessment                                         | <input type="checkbox"/> | <input type="checkbox"/> | Date of Discharge:<br><input type="text"/> / <input type="text"/> / <input type="text"/>            |
| a) If 'Yes', has the participant been discharged?                                                                                            | <input type="checkbox"/> | <input type="checkbox"/> | Date of Admission:<br><input type="text"/> / <input type="text"/> / <input type="text"/>            |
| 4) Has the participant been admitted as an inpatient in relation to their SWHSI or SWHSI treatment since the last assessment?<br>If 'Yes'... | <input type="checkbox"/> | <input type="checkbox"/> | Adverse Event Number <input type="text"/>                                                           |
| a) Has a SWHSI-2 Trial Adverse Event form been completed?                                                                                    | <input type="checkbox"/> | <input type="checkbox"/> | Date of Discharge:<br><input type="text"/> / <input type="text"/> / <input type="text"/>            |
| b) Has the participant been discharged?                                                                                                      | <input type="checkbox"/> | <input type="checkbox"/> | <input type="text"/> / <input type="text"/> / <input type="text"/>                                  |
| 5) Return to theatre due to SWHSI <input type="checkbox"/> Yes <input type="checkbox"/> No                                                   |                          |                          | <input type="text"/> / <input type="text"/> / <input type="text"/><br>dd mm yyyy                    |
| a) If 'Yes', in theatre was the participant's SWHSI (cross all that apply):                                                                  |                          |                          |                                                                                                     |
| <input type="checkbox"/> Surgically closed (flap)                                                                                            | <input type="checkbox"/> | <input type="checkbox"/> | <input type="checkbox"/> Surgically closed (skin graft)                                             |
| <input type="checkbox"/> Surgically closed (delayed primary healing)                                                                         | <input type="checkbox"/> | <input type="checkbox"/> | <input type="checkbox"/> Debrided                                                                   |
| <input type="checkbox"/> Incised and drained                                                                                                 | <input type="checkbox"/> | <input type="checkbox"/> | <input type="checkbox"/> Examined under anaesthetic                                                 |
| <input type="checkbox"/> Angioplasty                                                                                                         | <input type="checkbox"/> | <input type="checkbox"/> | <input type="checkbox"/> Revascularised                                                             |
| <input type="checkbox"/> Other (please specify) _____                                                                                        |                          |                          | <input type="checkbox"/> Amputated                                                                  |
| b) If 'Yes', has a SWHSI-2 Trial Adverse Event form been completed?                                                                          | <input type="checkbox"/> | <input type="checkbox"/> | Adverse Event Number <input type="text"/>                                                           |
| c) Where the participant's SWHSI was closed, was the decision for closure made by a clinician blind to treatment allocation?                 | <input type="checkbox"/> | <input type="checkbox"/> | <input type="checkbox"/> Yes <input type="checkbox"/> No                                            |
| d) If 'No', please indicate why this assessment was not blinded:                                                                             |                          |                          | <input type="text"/>                                                                                |

Please proceed to Section B

Participant ID:

**Section B – Treatment Status (Visit 1 only)**

1. Where is the participant currently receiving treatment? *(cross all that apply)*

- Community Clinic     Nursing Home     Patient's home     General ward     ICU  
 High Dependency Unit     Other (please specify):

2. Has the participant's treatment location changed **since the last assessment**?     Yes     No

a) If 'Yes', please select where the treatment was being received previously *(cross all that apply)*:

- Community Clinic     Nursing Home     Patient's home     General ward     ICU  
 High Dependency Unit     Other (please specify):

3. Please indicate the number of dressing changes the participant has received **since the last assessment** *(select one option)*:

- 1     2     3     4     5     6     7     8     9     10  
 11     12     13     14     Other (please specify):

4. Please indicate the participants current treatment status *(select one option)*:

- a)  Patient continues to receive NPWT with no changes **since the last assessment**  
If 'Yes', proceed to Section E
- b)  Patient continues to receive Usual Care with no changes **since the last assessment**  
If 'Yes', proceed to Section E
- c)  Patient continues to receive NPWT but changes have been made **since the last assessment**  
If 'Yes', proceed to Question 5
- d)  Patient continues to receive Usual Care but changes have been made **since the last assessment**  
If 'Yes', proceed to Question 5
- e)  Patient has changed from NPWT to Usual Care **since the last assessment**  
If 'Yes', proceed to Question 5
- f)  Patient has changed from Usual Care to NPWT **since the last assessment**  
If 'Yes', proceed to Question 5

5. Please indicate why the patient has had changes made since the last assessment *(cross all that apply)*:

- Wound improving     Wound healed     Wound bed prepared  
 Wound too dry     Deterioration of wound     Failure to maintain seal  
 Treatment caused pain     No change to wound  
 Other (please specify):

Was the change at:     Patient request     Clinician request

If participant is receiving NPWT, proceed to Section C

If participant is receiving Usual Care, proceed to Section D

Participant ID:

**Section C – Changes to NPWT Treatment** Please only complete if you have selected 4c or 4f

Please provide date change made:   /   /      
day month year

Please provide details of the NPWT treatment the patient is now receiving (*select one option*):

1.  V.A.C Ultra (KCI)  V.A.C Via (KCI)  
 InfoV.A.C (KCI)  ActiV.A.C (KCI)  
 Renasys (Smith and Nephew)  PICO (Smith and Nephew)  
 Avance (Molnlycke Health Care)  Avance Solo (Molnlycke Health Care)  
 Avelle (Convatec)  
 Other (please specify model and brand):

2. Amount of pressure being used:    mmHg

3. Is the pressure being applied:  Continuously  Intermittently

4. Type of NPWT dressing being used:

- Black, polyurethane foam dressings with reticulated (open) pores  
 White, polyvinyl alcohol with high tensile strength, pre-moistened with sterile water  
 Antimicrobial gauze (impregnated with Polyhexamethylene biguanide)

5. Has a liner been used with the dressing?  Yes  No

a) If 'Yes', was the liner silver impregnated?  Yes  No

*Please proceed to Section E*

**Section D – Changes to Usual Care Treatment** Please only complete if you have selected 4d or 4e

Please provide date change made:   /   /      
day month year

Please provide details of the Usual Care treatment the patient is now receiving (*cross all that apply*):

- |                                                               |                                                                 |
|---------------------------------------------------------------|-----------------------------------------------------------------|
| <input type="checkbox"/> Alginate                             | <input type="checkbox"/> Basic wound contact                    |
| <input type="checkbox"/> Cavity Foam                          | <input type="checkbox"/> Foam                                   |
| <input type="checkbox"/> Gauze Ribbon                         | <input type="checkbox"/> Hydrocolloid                           |
| <input type="checkbox"/> Hydrogel                             | <input type="checkbox"/> Hydrofoam/Spun Hydrocolloid            |
| <input type="checkbox"/> Honey                                | <input type="checkbox"/> Iodine Containing                      |
| <input type="checkbox"/> PHMB                                 | <input type="checkbox"/> Protease Modulating matrix             |
| <input type="checkbox"/> Silver containing                    | <input type="checkbox"/> Flamazine silver sulfadiazine dressing |
| <input type="checkbox"/> Urgotol silver sulfadiazine dressing | <input type="checkbox"/> Soft polymer                           |
| <input type="checkbox"/> Superabsorbent                       | <input type="checkbox"/> Vapour permeable film or membrane      |

Other (please specify):

Other (please specify):

*Please proceed to Section E*

Participant ID:

**Section E – Other Treatments**

1. Is the participant currently using antibiotics?  Yes  No

a) If 'Yes', please indicate the route of administration:

IV  Oral  Other (please specify):

b) If 'Yes', please indicate the reason:

Related to SWHSI  Other (please specify):

2. Is the participant receiving any other treatment for their SWHSI?  Yes  No

a) If 'Yes', please provide details below (*cross all that apply*):

Wound Management Systems  Emollient  Silver Nitrate Stick

Dietetic Input  Larvae

Other (please specify):

Other (please specify):

Other (please specify):

*Please proceed to Section F*

**Section F – Visit Checklist and Sign Off**

1. All Sections of the Weekly Assessment are complete?  Yes  No

2. Has the next weekly assessment (or first post wound healing visit if wound has healed) been arranged?  Yes  No

**Form Completed by (to be completed by delegated clinician or nurse who has reviewed CRF content for this visit)**

\*Name:

Signature:

Assessor ID:

Date:   /   /      
*day month year*

\*Must be reflected in the Delegation of Duties Log

Participant ID: Visit Date:  /  /   
day month year**Section A – Clinical Events**

Please review any previous assessments and AE/SAE forms for ongoing events before completing this section.

Have any of the following events occurred since the last assessment?

**Section A1 – Wound Healing**

| Event                                                                                                         | Yes                      | No                       | Event Date (dd/mm/yyyy)                                            |
|---------------------------------------------------------------------------------------------------------------|--------------------------|--------------------------|--------------------------------------------------------------------|
| 1) Has healing of the reference SWHSI (confirmed by a healthcare professional) occurred since the last visit? | <input type="checkbox"/> | <input type="checkbox"/> | <input type="text"/> / <input type="text"/> / <input type="text"/> |
| a) If 'No', does the participant think their wound has healed?                                                | <input type="checkbox"/> | <input type="checkbox"/> |                                                                    |

**Section A2 – Clinical Events**

| Event                                                                                                                                        | Yes                      | No                       | Event Date (dd/mm/yyyy)                                                                             |
|----------------------------------------------------------------------------------------------------------------------------------------------|--------------------------|--------------------------|-----------------------------------------------------------------------------------------------------|
| 1) Did the participant have an infected SWHSI at the last assessment?<br>a) If 'Yes', has the infection resolved?                            | <input type="checkbox"/> | <input type="checkbox"/> | Date of Infection Resolution:<br><input type="text"/> / <input type="text"/> / <input type="text"/> |
| 2) Has the participant had a new SWHSI infection since their last assessment?<br>If 'Yes'...                                                 | <input type="checkbox"/> | <input type="checkbox"/> | Date of New Infection:<br><input type="text"/> / <input type="text"/> / <input type="text"/>        |
| a) Has a SWHSI-2 Trial Adverse Event form been completed?                                                                                    | <input type="checkbox"/> | <input type="checkbox"/> | Adverse Event Number <input type="text"/>                                                           |
| b) Has the new infection been resolved?                                                                                                      | <input type="checkbox"/> | <input type="checkbox"/> | Date of Infection Resolution:<br><input type="text"/> / <input type="text"/> / <input type="text"/> |
| 3) Was the patient an inpatient in relation to their SWHSI or SWHSI treatment at the last assessment?                                        | <input type="checkbox"/> | <input type="checkbox"/> | Date of Discharge:<br><input type="text"/> / <input type="text"/> / <input type="text"/>            |
| a) If 'Yes', has the participant been discharged?                                                                                            | <input type="checkbox"/> | <input type="checkbox"/> | Date of Admission:<br><input type="text"/> / <input type="text"/> / <input type="text"/>            |
| 4) Has the participant been admitted as an inpatient in relation to their SWHSI or SWHSI treatment since the last assessment?<br>If 'Yes'... | <input type="checkbox"/> | <input type="checkbox"/> | Adverse Event Number <input type="text"/>                                                           |
| a) Has a SWHSI-2 Trial Adverse Event form been completed?                                                                                    | <input type="checkbox"/> | <input type="checkbox"/> | Date of Discharge:<br><input type="text"/> / <input type="text"/> / <input type="text"/>            |
| b) Has the participant been discharged?                                                                                                      | <input type="checkbox"/> | <input type="checkbox"/> | <input type="text"/> / <input type="text"/> / <input type="text"/>                                  |
| 5) Return to theatre due to SWHSI <input type="checkbox"/> Yes <input type="checkbox"/> No                                                   |                          |                          | <input type="text"/> / <input type="text"/> / <input type="text"/><br>dd mm yyyy                    |
| a) If 'Yes', in theatre was the participant's SWHSI (cross all that apply):                                                                  |                          |                          |                                                                                                     |
| <input type="checkbox"/> Surgically closed (flap)                                                                                            | <input type="checkbox"/> | <input type="checkbox"/> | <input type="checkbox"/> Surgically closed (skin graft)                                             |
| <input type="checkbox"/> Surgically closed (delayed primary healing)                                                                         | <input type="checkbox"/> | <input type="checkbox"/> | <input type="checkbox"/> Debrided                                                                   |
| <input type="checkbox"/> Incised and drained                                                                                                 | <input type="checkbox"/> | <input type="checkbox"/> | <input type="checkbox"/> Examined under anaesthetic                                                 |
| <input type="checkbox"/> Angioplasty                                                                                                         | <input type="checkbox"/> | <input type="checkbox"/> | <input type="checkbox"/> Revascularised                                                             |
| <input type="checkbox"/> Other (please specify) <input type="text"/>                                                                         |                          |                          | <input type="checkbox"/> Amputated                                                                  |
| b) If 'Yes', has a SWHSI-2 Trial Adverse Event form been completed?                                                                          | <input type="checkbox"/> | <input type="checkbox"/> | Adverse Event Number <input type="text"/>                                                           |
| c) Where the participant's SWHSI was closed, was the decision for closure made by a clinician blind to treatment allocation?                 | <input type="checkbox"/> | <input type="checkbox"/> | <input type="checkbox"/> Yes <input type="checkbox"/> No                                            |
| d) If 'No', please indicate why this assessment was not blinded: <input type="text"/>                                                        |                          |                          |                                                                                                     |

Please proceed to Section B

Participant ID:

**Section B – Treatment Status (Visits 2-4 only)**

1. Has the location of the patient's treatment changed **since the last assessment**?  Yes  No

a) If 'Yes', please select where the patient is currently receiving treatment (*cross all that apply*):

- Community Clinic                       Nursing Home                       Patient's home  
 General ward                               ICU                                       High Dependency Unit  
 Other (please specify):

2. Please indicate the number of dressing changes the participant has received **since the last assessment** (*select one option*):

- 1     2     3     4     5     6     7     8     9     10  
 11     12     13     14     Other (please specify):

3. Please indicate the participants current treatment status (*select one option*):

- Patient continues to receive NPWT with no changes **since the last assessment**  
If 'Yes', proceed to Section E
- Patient continues to receive Usual Care with no changes **since the last assessment**  
If 'Yes', proceed to Section E
- Patient continues to receive NPWT but changes have been made **since the last assessment**  
If 'Yes', proceed to Question 4
- Patient continues to receive Usual Care but changes have been made **since the last assessment**  
If 'Yes', proceed to Question 4
- Patient has changed from NPWT to Usual Care **since the last assessment**  
If 'Yes', proceed to Question 4
- Patient has changed from Usual Care to NPWT **since the last assessment**  
If 'Yes', proceed to Question 4

4. Please indicate why the patient has had changes made since the last assessment (*cross all that apply*):

- Wound improving                       Wound healed                       Wound bed prepared  
 Wound too dry                               Deterioration of wound                       Failure to maintain seal  
 Treatment caused pain                       No change to wound  
 Other (please specify):

Was the change at:     Patient request     Clinician request

If participant is receiving NPWT, proceed to Section C

If participant is receiving Usual Care, proceed to Section D

Participant ID:

**Section C – Changes to NPWT Treatment** Please only complete if you have selected 3c or 3f

Please provide date change made:   /   /      
day month year

Please provide details of the NPWT treatment the patient is now receiving (*select one option*):

1.  V.A.C Ulta (KCI)  V.A.C Via (KCI)  
 InfoV.A.C (KCI)  ActiV.A.C (KCI)  
 Renasys (Smith and Nephew)  PICO (Smith and Nephew)  
 Avance (Molnlycke Health Care)  Avance Solo (Molnlycke Health Care)  
 Avelle (Convatec)  
 Other (please specify model and brand):

2. Amount of pressure being used:    mmHg

3. Is the pressure being applied:  Continuously  Intermittently

4. Type of NPWT dressing being used:

- Black, polyurethane foam dressings with reticulated (open) pores  
 White, polyvinyl alcohol with high tensile strength, pre-moistened with sterile water  
 Antimicrobial gauze (impregnated with Polyhexamethylene biguanide)

5. Has a liner been used with the dressing?  Yes  No

a) If 'Yes', was the liner silver impregnated?  Yes  No

*Please proceed to Section E*

**Section D – Changes to Usual Care Treatment** Please only complete if you have selected 3d or 3e

Please provide date change made:   /   /      
day month year

Please provide details of the Usual Care treatment the patient is now receiving (*cross all that apply*):

- Alginate  Basic wound contact  
 Cavity Foam  Foam  
 Gauze Ribbon  Hydrocolloid  
 Hydrogel  Hydrofoam/Spun Hydrocolloid  
 Honey  Iodine Containing  
 PHMB  Protease Modulating matrix  
 Silver containing  Flamazine silver sulfadiazine dressing  
 Urgotol silver sulfadiazine dressing  Soft polymer  
 Superabsorbent  Vapour permeable film or membrane

Other (please specify):

Other (please specify):

*Please proceed to Section E*



Participant ID:

**Section E – Other Treatments**

1. Is the participant currently using antibiotics?  Yes  No
- a) If 'Yes', please indicate the route of administration:  
 IV  Oral  Other (please specify):
- b) If 'Yes', please indicate the reason:  
 Related to SWHSI  Other (please specify):
2. Is the participant receiving any other treatment for their SWHSI?  Yes  No
- a) If 'Yes', please provide details below (*cross all that apply*):
- Wound Management Systems  Emollient  Silver Nitrate Stick
- Dietetic Input  Larvae
- Other (please specify):
- Other (please specify):
- Other (please specify):

*Please proceed to Section F*

**Section F – Visit Checklist and Sign Off**

1. All Sections of the Weekly Assessment are complete?  Yes  No
2. Has the next weekly assessment (or first post wound healing visit if wound has healed) been arranged?  Yes  No

Form Completed by (to be completed by delegated clinician or nurse who has reviewed CRF content for this visit)

\*Name:

Signature:

Assessor ID:

Date:  /  /   
*day month year*

\*Must be reflected in the Delegation of Duties Log

Participant ID: Visit Date:  /  /   
day month year**Section A – Clinical Events**

Please review any previous assessments and AE/SAE forms for ongoing events before completing this section.

Have any of the following events occurred since the last assessment?

**Section A1 – Wound Healing**

| Event                                                                                                         | Yes                      | No                       | Event Date (dd/mm/yyyy)                                            |
|---------------------------------------------------------------------------------------------------------------|--------------------------|--------------------------|--------------------------------------------------------------------|
| 1) Has healing of the reference SWHSI (confirmed by a healthcare professional) occurred since the last visit? | <input type="checkbox"/> | <input type="checkbox"/> | <input type="text"/> / <input type="text"/> / <input type="text"/> |
| a) If 'No', does the participant think their wound has healed?                                                | <input type="checkbox"/> | <input type="checkbox"/> |                                                                    |

**Section A2 – Clinical Events**

| Event                                                                                                                         | Yes                          | No                          | Event Date (dd/mm/yyyy)                                                                          |
|-------------------------------------------------------------------------------------------------------------------------------|------------------------------|-----------------------------|--------------------------------------------------------------------------------------------------|
| 1) Did the participant have an infected SWHSI at the last assessment?                                                         | <input type="checkbox"/>     | <input type="checkbox"/>    | Date of Infection Resolution: <input type="text"/> / <input type="text"/> / <input type="text"/> |
| a) If 'Yes', has the infection resolved?                                                                                      | <input type="checkbox"/>     | <input type="checkbox"/>    | Date of New Infection: <input type="text"/> / <input type="text"/> / <input type="text"/>        |
| 2) Has the participant had a new SWHSI infection since their last assessment?                                                 | <input type="checkbox"/>     | <input type="checkbox"/>    | Adverse Event Number <input type="text"/>                                                        |
| If 'Yes'...                                                                                                                   |                              |                             | Date of Infection Resolution: <input type="text"/> / <input type="text"/> / <input type="text"/> |
| a) Has a SWHSI-2 Trial Adverse Event form been completed?                                                                     | <input type="checkbox"/>     | <input type="checkbox"/>    |                                                                                                  |
| b) Has the new infection been resolved?                                                                                       | <input type="checkbox"/>     | <input type="checkbox"/>    |                                                                                                  |
| 3) Was the patient an inpatient in relation to their SWHSI or SWHSI treatment at the last assessment?                         | <input type="checkbox"/>     | <input type="checkbox"/>    | Date of Discharge: <input type="text"/> / <input type="text"/> / <input type="text"/>            |
| a) If 'Yes', has the participant been discharged?                                                                             | <input type="checkbox"/>     | <input type="checkbox"/>    | Date of Admission: <input type="text"/> / <input type="text"/> / <input type="text"/>            |
| 4) Has the participant been admitted as an inpatient in relation to their SWHSI or SWHSI treatment since the last assessment? | <input type="checkbox"/>     | <input type="checkbox"/>    | Adverse Event Number <input type="text"/>                                                        |
| If 'Yes'...                                                                                                                   |                              |                             | Date of Discharge: <input type="text"/> / <input type="text"/> / <input type="text"/>            |
| a) Has a SWHSI-2 Trial Adverse Event form been completed?                                                                     | <input type="checkbox"/>     | <input type="checkbox"/>    |                                                                                                  |
| b) Has the participant been discharged?                                                                                       | <input type="checkbox"/>     | <input type="checkbox"/>    |                                                                                                  |
| 5) Return to theatre due to SWHSI <input type="checkbox"/> Yes <input type="checkbox"/> No                                    |                              |                             | <input type="text"/> / <input type="text"/> / <input type="text"/><br>dd mm yyyy                 |
| a) If 'Yes', in theatre was the participant's SWHSI (cross all that apply):                                                   |                              |                             |                                                                                                  |
| <input type="checkbox"/> Surgically closed (flap)                                                                             |                              |                             | <input type="checkbox"/> Surgically closed (skin graft)                                          |
| <input type="checkbox"/> Surgically closed (delayed primary healing)                                                          |                              |                             | <input type="checkbox"/> Debrided                                                                |
| <input type="checkbox"/> Incised and drained                                                                                  |                              |                             | <input type="checkbox"/> Revascularised                                                          |
| <input type="checkbox"/> Angioplasty                                                                                          |                              |                             | <input type="checkbox"/> Amputated                                                               |
| <input type="checkbox"/> Other (please specify) <input type="text"/>                                                          |                              |                             |                                                                                                  |
| b) If 'Yes', has a SWHSI-2 Trial Adverse Event form been completed?                                                           | <input type="checkbox"/> Yes | <input type="checkbox"/> No | Adverse Event Number <input type="text"/>                                                        |
| c) Where the participant's SWHSI was closed, was the decision for closure made by a clinician blind to treatment allocation?  | <input type="checkbox"/> Yes | <input type="checkbox"/> No |                                                                                                  |
| d) If 'No', please indicate why this assessment was not blinded: <input type="text"/>                                         |                              |                             |                                                                                                  |

Please proceed to Section B

Participant ID:

**Section B – Treatment Status (Visits 2-4 only)**

1. Has the location of the patient's treatment changed **since the last assessment**?  Yes  No

a) If 'Yes', please select where the patient is currently receiving treatment (*cross all that apply*):

- Community Clinic  Nursing Home  Patient's home  
 General ward  ICU  High Dependency Unit  
 Other (please specify):

2. Please indicate the number of dressing changes the participant has received **since the last assessment** (*select one option*):

- 1  2  3  4  5  6  7  8  9  10  
 11  12  13  14  Other (please specify):

3. Please indicate the participants current treatment status (*select one option*):

- Patient continues to receive NPWT with no changes **since the last assessment**  
If 'Yes', proceed to Section E
- Patient continues to receive Usual Care with no changes **since the last assessment**  
If 'Yes', proceed to Section E
- Patient continues to receive NPWT but changes have been made **since the last assessment**  
If 'Yes', proceed to Question 4
- Patient continues to receive Usual Care but changes have been made **since the last assessment**  
If 'Yes', proceed to Question 4
- Patient has changed from NPWT to Usual Care **since the last assessment**  
If 'Yes', proceed to Question 4
- Patient has changed from Usual Care to NPWT **since the last assessment**  
If 'Yes', proceed to Question 4

4. Please indicate why the patient has had changes made since the last assessment (*cross all that apply*):

- Wound improving  Wound healed  Wound bed prepared  
 Wound too dry  Deterioration of wound  Failure to maintain seal  
 Treatment caused pain  No change to wound  
 Other (please specify):

Was the change at:  Patient request  Clinician request

If participant is receiving NPWT, proceed to Section C

If participant is receiving Usual Care, proceed to Section D

Participant ID:

**Section C – Changes to NPWT Treatment** Please only complete if you have selected 3c or 3f

Please provide date change made:   /   /      
day month year

Please provide details of the NPWT treatment the patient is now receiving (*select one option*):

1.  V.A.C Ulta (KCI)  V.A.C Via (KCI)  
 InfoV.A.C (KCI)  ActiV.A.C (KCI)  
 Renasys (Smith and Nephew)  PICO (Smith and Nephew)  
 Avance (Molnlycke Health Care)  Avance Solo (Molnlycke Health Care)  
 Avelle (Convatec)  
 Other (please specify model and brand):

2. Amount of pressure being used:    mmHg

3. Is the pressure being applied:  Continuously  Intermittently

4. Type of NPWT dressing being used:

- Black, polyurethane foam dressings with reticulated (open) pores  
 White, polyvinyl alcohol with high tensile strength, pre-moistened with sterile water  
 Antimicrobial gauze (impregnated with Polyhexamethylene biguanide)

5. Has a liner been used with the dressing?  Yes  No

a) If 'Yes', was the liner silver impregnated?  Yes  No

*Please proceed to Section E*

**Section D – Changes to Usual Care Treatment** Please only complete if you have selected 3d or 3e

Please provide date change made:   /   /      
day month year

Please provide details of the Usual Care treatment the patient is now receiving (*cross all that apply*):

- Alginate  Basic wound contact  
 Cavity Foam  Foam  
 Gauze Ribbon  Hydrocolloid  
 Hydrogel  Hydrofoam/Spun Hydrocolloid  
 Honey  Iodine Containing  
 PHMB  Protease Modulating matrix  
 Silver containing  Flamazine silver sulfadiazine dressing  
 Urgotol silver sulfadiazine dressing  Soft polymer  
 Superabsorbent  Vapour permeable film or membrane

Other (please specify):

Other (please specify):

*Please proceed to Section E*

Participant ID:

**Section E – Other Treatments**

1. Is the participant currently using antibiotics?  Yes  No
- a) If 'Yes', please indicate the route of administration:  
 IV  Oral  Other (please specify):
- b) If 'Yes', please indicate the reason:  
 Related to SWHSI  Other (please specify):
2. Is the participant receiving any other treatment for their SWHSI?  Yes  No
- a) If 'Yes', please provide details below (*cross all that apply*):
- Wound Management Systems  Emollient  Silver Nitrate Stick
- Dietetic Input  Larvae
- Other (please specify):
- Other (please specify):
- Other (please specify):

*Please proceed to Section F*

**Section F – Visit Checklist and Sign Off**

1. All Sections of the Weekly Assessment are complete?  Yes  No
2. Has the next weekly assessment (or first post wound healing visit if wound has healed) been arranged?  Yes  No

Form Completed by (to be completed by delegated clinician or nurse who has reviewed CRF content for this visit)

\*Name:

Signature:

Assessor ID:

Date:  /  /   
*day month year*

\*Must be reflected in the Delegation of Duties Log

Participant ID: Visit Date:  /  /   
day month year**Section A – Clinical Events**

Please review any previous assessments and AE/SAE forms for ongoing events before completing this section.

Have any of the following events occurred since the last assessment?

**Section A1 – Wound Healing**

| Event                                                                                                         | Yes                      | No                       | Event Date (dd/mm/yyyy)                                            |
|---------------------------------------------------------------------------------------------------------------|--------------------------|--------------------------|--------------------------------------------------------------------|
| 1) Has healing of the reference SWHSI (confirmed by a healthcare professional) occurred since the last visit? | <input type="checkbox"/> | <input type="checkbox"/> | <input type="text"/> / <input type="text"/> / <input type="text"/> |
| a) If 'No', does the participant think their wound has healed?                                                | <input type="checkbox"/> | <input type="checkbox"/> |                                                                    |

**Section A2 – Clinical Events**

| Event                                                                                                                                        | Yes                      | No                       | Event Date (dd/mm/yyyy)                                                                             |
|----------------------------------------------------------------------------------------------------------------------------------------------|--------------------------|--------------------------|-----------------------------------------------------------------------------------------------------|
| 1) Did the participant have an infected SWHSI at the last assessment?<br>a) If 'Yes', has the infection resolved?                            | <input type="checkbox"/> | <input type="checkbox"/> | Date of Infection Resolution:<br><input type="text"/> / <input type="text"/> / <input type="text"/> |
| 2) Has the participant had a new SWHSI infection since their last assessment?<br>If 'Yes'...                                                 | <input type="checkbox"/> | <input type="checkbox"/> | Date of New Infection:<br><input type="text"/> / <input type="text"/> / <input type="text"/>        |
| a) Has a SWHSI-2 Trial Adverse Event form been completed?                                                                                    | <input type="checkbox"/> | <input type="checkbox"/> | Adverse Event Number <input type="text"/>                                                           |
| b) Has the new infection been resolved?                                                                                                      | <input type="checkbox"/> | <input type="checkbox"/> | Date of Infection Resolution:<br><input type="text"/> / <input type="text"/> / <input type="text"/> |
| 3) Was the patient an inpatient in relation to their SWHSI or SWHSI treatment at the last assessment                                         | <input type="checkbox"/> | <input type="checkbox"/> | Date of Discharge:<br><input type="text"/> / <input type="text"/> / <input type="text"/>            |
| a) If 'Yes', has the participant been discharged?                                                                                            | <input type="checkbox"/> | <input type="checkbox"/> | Date of Admission:<br><input type="text"/> / <input type="text"/> / <input type="text"/>            |
| 4) Has the participant been admitted as an inpatient in relation to their SWHSI or SWHSI treatment since the last assessment?<br>If 'Yes'... | <input type="checkbox"/> | <input type="checkbox"/> | Adverse Event Number <input type="text"/>                                                           |
| a) Has a SWHSI-2 Trial Adverse Event form been completed?                                                                                    | <input type="checkbox"/> | <input type="checkbox"/> | Date of Discharge:<br><input type="text"/> / <input type="text"/> / <input type="text"/>            |
| b) Has the participant been discharged?                                                                                                      | <input type="checkbox"/> | <input type="checkbox"/> | <input type="text"/> / <input type="text"/> / <input type="text"/>                                  |
| 5) Return to theatre due to SWHSI <input type="checkbox"/> Yes <input type="checkbox"/> No                                                   |                          |                          | <input type="text"/> / <input type="text"/> / <input type="text"/><br>dd mm yyyy                    |
| a) If 'Yes', in theatre was the participant's SWHSI (cross all that apply):                                                                  |                          |                          |                                                                                                     |
| <input type="checkbox"/> Surgically closed (flap)                                                                                            | <input type="checkbox"/> | <input type="checkbox"/> | <input type="checkbox"/> Surgically closed (skin graft)                                             |
| <input type="checkbox"/> Surgically closed (delayed primary healing)                                                                         | <input type="checkbox"/> | <input type="checkbox"/> | <input type="checkbox"/> Debrided                                                                   |
| <input type="checkbox"/> Incised and drained                                                                                                 | <input type="checkbox"/> | <input type="checkbox"/> | <input type="checkbox"/> Revascularised                                                             |
| <input type="checkbox"/> Angioplasty                                                                                                         | <input type="checkbox"/> | <input type="checkbox"/> | <input type="checkbox"/> Examined under anaesthetic                                                 |
| <input type="checkbox"/> Other (please specify) _____                                                                                        | <input type="checkbox"/> | <input type="checkbox"/> | <input type="checkbox"/> Amputated                                                                  |
| b) If 'Yes', has a SWHSI-2 Trial Adverse Event form been completed?                                                                          | <input type="checkbox"/> | <input type="checkbox"/> | Adverse Event Number <input type="text"/>                                                           |
| c) Where the participant's SWHSI was closed, was the decision for closure made by a clinician blind to treatment allocation?                 | <input type="checkbox"/> | <input type="checkbox"/> | <input type="checkbox"/> Yes <input type="checkbox"/> No                                            |
| d) If 'No', please indicate why this assessment was not blinded: _____                                                                       |                          |                          |                                                                                                     |

Please proceed to Section B

Participant ID:

## **Section B – Treatment Status (Visits 2-4 only)**

1. Has the location of the patient's treatment changed **since the last assessment**?  Yes  No

a) If 'Yes', please select where the patient is currently receiving treatment (*cross all that apply*):

- Community Clinic  Nursing Home  Patient's home  
 General ward  ICU  High Dependency Unit  
 Other (please specify):

2. Please indicate the number of dressing changes the participant has received **since the last assessment** (*select one option*):

- 1  2  3  4  5  6  7  8  9  10  
 11  12  13  14  Other (please specify):

3. Please indicate the participants current treatment status (*select one option*):

- Patient continues to receive NPWT with no changes **since the last assessment**  
If 'Yes', proceed to Section E
- Patient continues to receive Usual Care with no changes **since the last assessment**  
If 'Yes', proceed to Section E
- Patient continues to receive NPWT but changes have been made **since the last assessment**  
If 'Yes', proceed to Question 4
- Patient continues to receive Usual Care but changes have been made **since the last assessment**  
If 'Yes', proceed to Question 4
- Patient has changed from NPWT to Usual Care **since the last assessment**  
If 'Yes', proceed to Question 4
- Patient has changed from Usual Care to NPWT **since the last assessment**  
If 'Yes', proceed to Question 4

4. Please indicate why the patient has had changes made since the last assessment (*cross all that apply*):

- Wound improving  Wound healed  Wound bed prepared  
 Wound too dry  Deterioration of wound  Failure to maintain seal  
 Treatment caused pain  No change to wound  
 Other (please specify):

Was the change at:  Patient request  Clinician request

If participant is receiving NPWT, proceed to Section C

If participant is receiving Usual Care, proceed to Section D

Participant ID:

**Section C – Changes to NPWT Treatment** Please only complete if you have selected 3c or 3f

Please provide date change made:   /   /      
day month year

Please provide details of the NPWT treatment the patient is now receiving (*select one option*):

1.  V.A.C Ulta (KCI)  V.A.C Via (KCI)  
 InfoV.A.C (KCI)  ActiV.A.C (KCI)  
 Renasys (Smith and Nephew)  PICO (Smith and Nephew)  
 Avance (Molnlycke Health Care)  Avance Solo (Molnlycke Health Care)  
 Avelle (Convatec)  
 Other (please specify model and brand):

2. Amount of pressure being used:    mmHg

3. Is the pressure being applied:  Continuously  Intermittently

4. Type of NPWT dressing being used:

- Black, polyurethane foam dressings with reticulated (open) pores  
 White, polyvinyl alcohol with high tensile strength, pre-moistened with sterile water  
 Antimicrobial gauze (impregnated with Polyhexamethylene biguanide)

5. Has a liner been used with the dressing?  Yes  No

a) If 'Yes', was the liner silver impregnated?  Yes  No

*Please proceed to Section E*

**Section D – Changes to Usual Care Treatment** Please only complete if you have selected 3d or 3e

Please provide date change made:   /   /      
day month year

Please provide details of the Usual Care treatment the patient is now receiving (*cross all that apply*):

- Alginate  Basic wound contact  
 Cavity Foam  Foam  
 Gauze Ribbon  Hydrocolloid  
 Hydrogel  Hydrofoam/Spun Hydrocolloid  
 Honey  Iodine Containing  
 PHMB  Protease Modulating matrix  
 Silver containing  Flamazine silver sulfadiazine dressing  
 Urgotol silver sulfadiazine dressing  Soft polymer  
 Superabsorbent  Vapour permeable film or membrane

Other (please specify):

Other (please specify):

*Please proceed to Section E*



Participant ID:

**Section E – Other Treatments**

1. Is the participant currently using antibiotics?  Yes  No

a) If 'Yes', please indicate the route of administration:

IV  Oral  Other (please specify):

b) If 'Yes', please indicate the reason:

Related to SWHSI  Other (please specify):

2. Is the participant receiving any other treatment for their SWHSI?  Yes  No

a) If 'Yes', please provide details below (*cross all that apply*):

Wound Management Systems  Emollient  Silver Nitrate Stick

Dietetic Input  Larvae

Other (please specify):

Other (please specify):

Other (please specify):

*Please proceed to Section F*

**Section F – Visit Checklist and Sign Off**

1. All Sections of the Weekly Assessment are complete?  Yes  No

2. Has the next weekly assessment (or first post wound healing visit if wound has healed) been arranged?  Yes  No

Form Completed by (to be completed by delegated clinician or nurse who has reviewed CRF content for this visit)

\*Name:

Signature:

Assessor ID:

Date:  /  /   
*day month year*

\*Must be reflected in the Delegation of Duties Log
