# Supplementary material
Source: PubMed Central journal article supplement (PMC8547049)
Supplement: 13063_2021_5662_MOESM4_ESM.pdf [file 13063_2021_5662_MOESM4_ESM.pdf]

## SWHSI-2 Trial

### Treatment Delivery Case Report Form

### FOR STUDY INVESTIGATOR COMPLETION

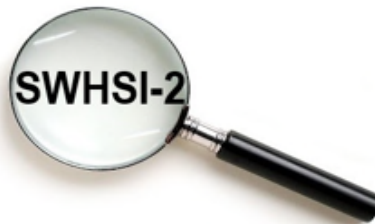

Site ID:

|  |  |
|--|--|
|  |  |
|--|--|

Participant ID:

|  |  |  |  |
|--|--|--|--|
|  |  |  |  |
|--|--|--|--|

Assessment Date:

|            |  |   |              |  |   |             |  |  |  |
|------------|--|---|--------------|--|---|-------------|--|--|--|
|            |  | / |              |  | / |             |  |  |  |
| <i>day</i> |  |   | <i>month</i> |  |   | <i>year</i> |  |  |  |

### Instructions for Completion

This CRF may be completed by the principal investigator or a delegated member of staff listed on the SWHSI-2 Trial Delegation Log.

Please refer to the associated SWHSI-2 Trial Specific Procedure for full details of how to complete this CRF.

Please complete all sections of this questionnaire using the spaces provided, and sign off when complete.

Please do not include any patient identifiable information when completing this CRF. When complete, please remove the staple and take a photocopy of the completed CRF for your site records. **Please do not re-staple the original.** Place the unstapled original in a "SWHSI-2 Trial business reply envelope" and send via post to York Trials Unit.

This project is funded by the National Institute for Health Research Health Technology Assessment Programme (Project number 17/42/94)

**Section A – Pre Treatment Confirmation**

1. Please confirm the treatment the participant was randomised to receive:

Intervention (NPWT)       Usual Care (Standard Care)

2. Is the assigned treatment going to be applied?       Yes       No

If 'Yes', and allocated to Usual Care, please proceed to Section B. If allocated to NPWT please proceed to Section C.

If 'No', please provide a reason, complete a change of status form (if required) and provide details of treatment received in the relevant section below.

**Section B – Usual Care Details**

1. Please select treatment being used following randomisation: *(select all applicable)*

- |                                                               |                                                                 |
|---------------------------------------------------------------|-----------------------------------------------------------------|
| <input type="checkbox"/> Alginate                             | <input type="checkbox"/> Basic wound contact                    |
| <input type="checkbox"/> Cavity Foam                          | <input type="checkbox"/> Foam                                   |
| <input type="checkbox"/> Gauze Ribbon                         | <input type="checkbox"/> Hydrocolloid                           |
| <input type="checkbox"/> Hydrogel                             | <input type="checkbox"/> Hydrofoam/Spun Hydrocolloid            |
| <input type="checkbox"/> Honey                                | <input type="checkbox"/> Iodine Containing                      |
| <input type="checkbox"/> PHMB                                 | <input type="checkbox"/> Protease Modulating matrix             |
| <input type="checkbox"/> Silver containing                    | <input type="checkbox"/> Flamazine silver sulfadiazine dressing |
| <input type="checkbox"/> Urgotol silver sulfadiazine dressing | <input type="checkbox"/> Soft polymer                           |
| <input type="checkbox"/> Superabsorbent                       | <input type="checkbox"/> Vapour permeable film or membrane      |
| <input type="checkbox"/> Other (please specify):              | <input type="text"/>                                            |
| <input type="checkbox"/> Other (please specify):              | <input type="text"/>                                            |

*Please proceed to Section C*

**Section C – NPWT Details**

1. Date NPWT treatment started:   /   /      
*day month year*

2. Was treatment provided within 48 hours of randomisation?  Yes  No

If 'Yes', please proceed to Question 3

If 'No', please provide reason for treatment delay:

- NPWT machine unavailable
- NPWT pump on order
- Trained staff member unavailable
- Patient unwilling to wait for treatment prior to discharge
- Patient moving to different care provider (e.g. from hospital to community care)
- Other (please specify):

3. Type of machine used:

- |                                                                                       |                                                              |
|---------------------------------------------------------------------------------------|--------------------------------------------------------------|
| <input type="checkbox"/> V.A.C Ulta (KCI)                                             | <input type="checkbox"/> V.A.C Via (KCI)                     |
| <input type="checkbox"/> InfoV.A.C (KCI)                                              | <input type="checkbox"/> ActiV.A.C (KCI)                     |
| <input type="checkbox"/> Renasys (Smith and Nephew)                                   | <input type="checkbox"/> PICO (Smith and Nephew)             |
| <input type="checkbox"/> Avance (Molnlycke Health Care)                               | <input type="checkbox"/> Avance Solo (Molnlycke Health Care) |
| <input type="checkbox"/> Avelle (Convatec)                                            |                                                              |
| <input type="checkbox"/> Other (please specify model and brand): <input type="text"/> |                                                              |

4. Amount of pressure being used:    mmHg

5. Is the pressure being applied:  Continuously  Intermittently

6. Type of NPWT dressing being used:

- Black, polyurethane foam dressings with reticulated (open) pores
- White, polyvinyl alcohol with high tensile strength, pre-moistened with sterile water
- Antimicrobial gauze (impregnated with Polyhexamethylene biguanide)

7. Has a liner been used with the dressing?  Yes  No

If 'Yes', was the liner silver impregnated?  Yes  No

*Please proceed to Section D*

Participant ID:

**Section D – Other Treatments**

1. Is the participant receiving any other treatment for their SWHSI?  Yes  No

If 'Yes', please provide details below:

Wound Management Systems  Emollient  Silver Nitrate Stick

Dietetic Input  Larvae

Other (please specify):

Other (please specify):

Other (please specify):

*Please proceed to Section E*

**Section E – Checklist and CRF Sign Off**

All Sections of the Treatment Delivery CRF are complete  Yes  No

Form Completed by: (to be completed by delegated clinician or nurse who has reviewed CRF content)

\*Name:

Signature:

Assessor ID:

Date:  /  /   
*day month year*

\*Must be reflected in the Delegation of Duties Log
