# Supplementary material
Source: PubMed Central journal article supplement (PMC8547049)
Supplement: 13063_2021_5662_MOESM5_ESM.pdf [file 13063_2021_5662_MOESM5_ESM.pdf]

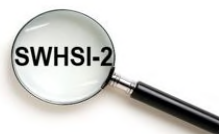

Participant ID:

**SWHSI-2 Supplementary Page for Outpatient Visits**

Please continue to record any outpatient visits (in addition to those recorded in the 12M Resource Use CRF)

| Visit Date                                                                                          | Clinic Type                                                                                                                                                                                                                                                                                                                                                                                                                                     | Other Treatment Provided                                                                                                                                                                                                                                                                                                                                                                                                         | Adverse Event                                                                                                  |
|-----------------------------------------------------------------------------------------------------|-------------------------------------------------------------------------------------------------------------------------------------------------------------------------------------------------------------------------------------------------------------------------------------------------------------------------------------------------------------------------------------------------------------------------------------------------|----------------------------------------------------------------------------------------------------------------------------------------------------------------------------------------------------------------------------------------------------------------------------------------------------------------------------------------------------------------------------------------------------------------------------------|----------------------------------------------------------------------------------------------------------------|
| <input type="text"/> / <input type="text"/> / <input type="text"/><br><small>Day Month Year</small> | Diabetic Foot Clinic <input type="checkbox"/> Occupational Therapy <input type="checkbox"/><br>Pain Management <input type="checkbox"/> Physiotherapy <input type="checkbox"/><br>Podiatry <input type="checkbox"/> Post Surgical Review <input type="checkbox"/><br>Speciality Dressing <input type="checkbox"/> Tissue Viability <input type="checkbox"/><br>Clinic<br>Other, please specify <input type="checkbox"/><br><input type="text"/> | Yes <input type="checkbox"/> No <input type="checkbox"/><br>If Yes, please stick all that apply:<br>Larvae <input type="checkbox"/> Analgesia <input type="checkbox"/> Antibiotic <input type="checkbox"/><br>Dietetic Input <input type="checkbox"/> Topical Treatments <input type="checkbox"/><br>Wound Management Systems <input type="checkbox"/><br>Other, please specify <input type="checkbox"/><br><input type="text"/> | Reported?<br>Yes <input type="checkbox"/> No <input type="checkbox"/><br><br>AE Number<br><input type="text"/> |
| <input type="text"/> / <input type="text"/> / <input type="text"/><br><small>Day Month Year</small> | Diabetic Foot Clinic <input type="checkbox"/> Occupational Therapy <input type="checkbox"/><br>Pain Management <input type="checkbox"/> Physiotherapy <input type="checkbox"/><br>Podiatry <input type="checkbox"/> Post Surgical Review <input type="checkbox"/><br>Speciality Dressing <input type="checkbox"/> Tissue Viability <input type="checkbox"/><br>Clinic<br>Other, please specify <input type="checkbox"/><br><input type="text"/> | Yes <input type="checkbox"/> No <input type="checkbox"/><br>If Yes, please stick all that apply:<br>Larvae <input type="checkbox"/> Analgesia <input type="checkbox"/> Antibiotic <input type="checkbox"/><br>Dietetic Input <input type="checkbox"/> Topical Treatments <input type="checkbox"/><br>Wound Management Systems <input type="checkbox"/><br>Other, please specify <input type="checkbox"/><br><input type="text"/> | Reported?<br>Yes <input type="checkbox"/> No <input type="checkbox"/><br><br>AE Number<br><input type="text"/> |

| Visit Date                                                                                          | Clinic Type                                                                                                                                                                                                                                                                                                                                                                                                                                  | Other Treatment Provided                                                                                                                                                                                                                                                                                                                                                                                                         | Adverse Event                                                                                                  |
|-----------------------------------------------------------------------------------------------------|----------------------------------------------------------------------------------------------------------------------------------------------------------------------------------------------------------------------------------------------------------------------------------------------------------------------------------------------------------------------------------------------------------------------------------------------|----------------------------------------------------------------------------------------------------------------------------------------------------------------------------------------------------------------------------------------------------------------------------------------------------------------------------------------------------------------------------------------------------------------------------------|----------------------------------------------------------------------------------------------------------------|
| <input type="text"/> / <input type="text"/> / <input type="text"/><br><small>Day Month Year</small> | Diabetic Foot Clinic <input type="checkbox"/> Occupational Therapy <input type="checkbox"/><br>Pain Management <input type="checkbox"/> Physiotherapy <input type="checkbox"/><br>Podiatry <input type="checkbox"/> Post Surgical Review <input type="checkbox"/><br>Speciality Dressing Clinic <input type="checkbox"/> Tissue Viability <input type="checkbox"/><br>Other, please specify <input type="checkbox"/><br><input type="text"/> | Yes <input type="checkbox"/> No <input type="checkbox"/><br>If Yes, please stick all that apply:<br>Larvae <input type="checkbox"/> Analgesia <input type="checkbox"/> Antibiotic <input type="checkbox"/><br>Dietetic Input <input type="checkbox"/> Topical Treatments <input type="checkbox"/><br>Wound Management Systems <input type="checkbox"/><br>Other, please specify <input type="checkbox"/><br><input type="text"/> | Reported?<br>Yes <input type="checkbox"/> No <input type="checkbox"/><br><br>AE Number<br><input type="text"/> |
| <input type="text"/> / <input type="text"/> / <input type="text"/><br><small>Day Month Year</small> | Diabetic Foot Clinic <input type="checkbox"/> Occupational Therapy <input type="checkbox"/><br>Pain Management <input type="checkbox"/> Physiotherapy <input type="checkbox"/><br>Podiatry <input type="checkbox"/> Post Surgical Review <input type="checkbox"/><br>Speciality Dressing Clinic <input type="checkbox"/> Tissue Viability <input type="checkbox"/><br>Other, please specify <input type="checkbox"/><br><input type="text"/> | Yes <input type="checkbox"/> No <input type="checkbox"/><br>If Yes, please stick all that apply:<br>Larvae <input type="checkbox"/> Analgesia <input type="checkbox"/> Antibiotic <input type="checkbox"/><br>Dietetic Input <input type="checkbox"/> Topical Treatments <input type="checkbox"/><br>Wound Management Systems <input type="checkbox"/><br>Other, please specify <input type="checkbox"/><br><input type="text"/> | Reported?<br>Yes <input type="checkbox"/> No <input type="checkbox"/><br><br>AE Number<br><input type="text"/> |

Form Completed by:

Name: \_\_\_\_\_

Assessor ID:

Date:  /  /      
Day Month Year
