# Supplementary material
Source: PubMed Central journal article supplement (PMC8547049)
Supplement: 13063_2021_5662_MOESM6_ESM.pdf [file 13063_2021_5662_MOESM6_ESM.pdf]

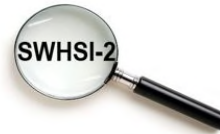

Participant ID:

**SWHSI-2 Supplementary Page for Inpatient Admissions**

Please continue to record any inpatient admissions (in addition to those recorded in the 12M Resource Use CRF)

| Admission Date                                                                                      | Surgical Intervention Provided                                                                                                                                                                                                                                                                                                                                                                                                                                                                                      | Other Treatment Provided                                                                                                                                                                                                                                                                                                                                                                                                                                                | Discharge Date                                                                                      | Adverse Event                                                                                                           |
|-----------------------------------------------------------------------------------------------------|---------------------------------------------------------------------------------------------------------------------------------------------------------------------------------------------------------------------------------------------------------------------------------------------------------------------------------------------------------------------------------------------------------------------------------------------------------------------------------------------------------------------|-------------------------------------------------------------------------------------------------------------------------------------------------------------------------------------------------------------------------------------------------------------------------------------------------------------------------------------------------------------------------------------------------------------------------------------------------------------------------|-----------------------------------------------------------------------------------------------------|-------------------------------------------------------------------------------------------------------------------------|
| <input type="text"/> / <input type="text"/> / <input type="text"/><br><small>Day Month Year</small> | <p style="text-align: center;">Yes <input type="checkbox"/> No <input type="checkbox"/></p> <p style="text-align: center;">If Yes, please tick all that apply:</p> <p>Amputation <input type="checkbox"/> Angioplasty <input type="checkbox"/></p> <p>Incision &amp; Drainage <input type="checkbox"/> Debridement <input type="checkbox"/></p> <p>Revascularisation <input type="checkbox"/> Wound Closure <input type="checkbox"/></p> <p><input type="checkbox"/> Other, please specify</p> <input type="text"/> | <p style="text-align: center;">Yes <input type="checkbox"/> No <input type="checkbox"/></p> <p style="text-align: center;">If Yes, please tick all that apply:</p> <p>Analgesia <input type="checkbox"/> Antibiotic <input type="checkbox"/></p> <p>Larvae <input type="checkbox"/> Topical Treatments <input type="checkbox"/></p> <p>Wound Management Systems <input type="checkbox"/></p> <p><input type="checkbox"/> Other, please specify</p> <input type="text"/> | <input type="text"/> / <input type="text"/> / <input type="text"/><br><small>Day Month Year</small> | <p>Reported?<br/>Yes <input type="checkbox"/> No <input type="checkbox"/></p> <p>AE Number<br/><input type="text"/></p> |
| <input type="text"/> / <input type="text"/> / <input type="text"/><br><small>Day Month Year</small> | <p style="text-align: center;">Yes <input type="checkbox"/> No <input type="checkbox"/></p> <p style="text-align: center;">If Yes, please tick all that apply:</p> <p>Amputation <input type="checkbox"/> Angioplasty <input type="checkbox"/></p> <p>Incision &amp; Drainage <input type="checkbox"/> Debridement <input type="checkbox"/></p> <p>Revascularisation <input type="checkbox"/> Wound Closure <input type="checkbox"/></p> <p><input type="checkbox"/> Other, please specify</p> <input type="text"/> | <p style="text-align: center;">Yes <input type="checkbox"/> No <input type="checkbox"/></p> <p style="text-align: center;">If Yes, please tick all that apply:</p> <p>Analgesia <input type="checkbox"/> Antibiotic <input type="checkbox"/></p> <p>Larvae <input type="checkbox"/> Topical Treatments <input type="checkbox"/></p> <p>Wound Management Systems <input type="checkbox"/></p> <p><input type="checkbox"/> Other, please specify</p> <input type="text"/> | <input type="text"/> / <input type="text"/> / <input type="text"/><br><small>Day Month Year</small> | <p>Reported?<br/>Yes <input type="checkbox"/> No <input type="checkbox"/></p> <p>AE Number<br/><input type="text"/></p> |

| Admission Date                                                                                      | Surgical Intervention Provided                                                                                                                                                                                                                                                                                                                                                                                                                                                                 | Other Treatment Provided                                                                                                                                                                                                                                                                                                                                                                                                                           | Discharge Date                                                                                      | Adverse Event                                                                                                           |
|-----------------------------------------------------------------------------------------------------|------------------------------------------------------------------------------------------------------------------------------------------------------------------------------------------------------------------------------------------------------------------------------------------------------------------------------------------------------------------------------------------------------------------------------------------------------------------------------------------------|----------------------------------------------------------------------------------------------------------------------------------------------------------------------------------------------------------------------------------------------------------------------------------------------------------------------------------------------------------------------------------------------------------------------------------------------------|-----------------------------------------------------------------------------------------------------|-------------------------------------------------------------------------------------------------------------------------|
| <input type="text"/> / <input type="text"/> / <input type="text"/><br><small>Day Month Year</small> | <p style="text-align: center;">Yes <input type="checkbox"/> No <input type="checkbox"/></p> <p style="text-align: center;">If Yes, please tick all that apply:</p> <p>Amputation <input type="checkbox"/> Angioplasty <input type="checkbox"/></p> <p>Incision &amp; Drainage <input type="checkbox"/> Debridement <input type="checkbox"/></p> <p>Revascularisation <input type="checkbox"/> Wound Closure <input type="checkbox"/></p> <p><input type="checkbox"/> Other, please specify</p> | <p style="text-align: center;">Yes <input type="checkbox"/> No <input type="checkbox"/></p> <p style="text-align: center;">If Yes, please tick all that apply:</p> <p>Analgesia <input type="checkbox"/> Antibiotic <input type="checkbox"/></p> <p>Larvae <input type="checkbox"/> Topical Treatments <input type="checkbox"/></p> <p>Wound Management Systems <input type="checkbox"/></p> <p><input type="checkbox"/> Other, please specify</p> | <input type="text"/> / <input type="text"/> / <input type="text"/><br><small>Day Month Year</small> | <p>Reported?<br/>Yes <input type="checkbox"/> No <input type="checkbox"/></p> <p>AE Number<br/><input type="text"/></p> |
| <input type="text"/> / <input type="text"/> / <input type="text"/><br><small>Day Month Year</small> | <p style="text-align: center;">Yes <input type="checkbox"/> No <input type="checkbox"/></p> <p style="text-align: center;">If Yes, please tick all that apply:</p> <p>Amputation <input type="checkbox"/> Angioplasty <input type="checkbox"/></p> <p>Incision &amp; Drainage <input type="checkbox"/> Debridement <input type="checkbox"/></p> <p>Revascularisation <input type="checkbox"/> Wound Closure <input type="checkbox"/></p> <p><input type="checkbox"/> Other, please specify</p> | <p style="text-align: center;">Yes <input type="checkbox"/> No <input type="checkbox"/></p> <p style="text-align: center;">If Yes, please tick all that apply:</p> <p>Analgesia <input type="checkbox"/> Antibiotic <input type="checkbox"/></p> <p>Larvae <input type="checkbox"/> Topical Treatments <input type="checkbox"/></p> <p>Wound Management Systems <input type="checkbox"/></p> <p><input type="checkbox"/> Other, please specify</p> | <input type="text"/> / <input type="text"/> / <input type="text"/><br><small>Day Month Year</small> | <p>Reported?<br/>Yes <input type="checkbox"/> No <input type="checkbox"/></p> <p>AE Number<br/><input type="text"/></p> |

Form Completed by:

Name: \_\_\_\_\_

Assessor ID:

Date:  /  /  20    
Day Month Year
