# Supplementary material
Source: PubMed Central journal article supplement (PMC8547049)
Supplement: 13063_2021_5662_MOESM7_ESM.pdf [file 13063_2021_5662_MOESM7_ESM.pdf]

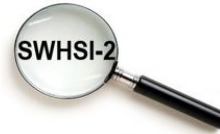

Participant ID:

**SWHSI-2 Supplementary Page for Accident and Emergency Visits**

Please continue to record any Accident and Emergency visits (in addition to those recorded in the 12M Resource Use CRF)

| Visit Date                                                                                          | Intervention provided                                                                                                                                                                                                                                                                | Was the patient admitted as an inpatient following the visit? | Adverse Event                                                                                              |
|-----------------------------------------------------------------------------------------------------|--------------------------------------------------------------------------------------------------------------------------------------------------------------------------------------------------------------------------------------------------------------------------------------|---------------------------------------------------------------|------------------------------------------------------------------------------------------------------------|
| <input type="text"/> / <input type="text"/> / <input type="text"/><br><small>Day Month Year</small> | <input type="checkbox"/> Antibiotic <input type="checkbox"/> Analgesia <input type="checkbox"/> Larvae<br><input type="checkbox"/> Topical Treatments<br><input type="checkbox"/> Wound Management Systems<br><input type="checkbox"/> Other, please specify<br><input type="text"/> | Yes <input type="checkbox"/> No <input type="checkbox"/>      | Reported?<br>Yes <input type="checkbox"/> No <input type="checkbox"/><br>AE Number<br><input type="text"/> |
| <input type="text"/> / <input type="text"/> / <input type="text"/><br><small>Day Month Year</small> | <input type="checkbox"/> Antibiotic <input type="checkbox"/> Analgesia <input type="checkbox"/> Larvae<br><input type="checkbox"/> Topical Treatments<br><input type="checkbox"/> Wound Management Systems<br><input type="checkbox"/> Other, please specify<br><input type="text"/> | Yes <input type="checkbox"/> No <input type="checkbox"/>      | Reported?<br>Yes <input type="checkbox"/> No <input type="checkbox"/><br>AE Number<br><input type="text"/> |
| <input type="text"/> / <input type="text"/> / <input type="text"/><br><small>Day Month Year</small> | <input type="checkbox"/> Antibiotic <input type="checkbox"/> Analgesia <input type="checkbox"/> Larvae<br><input type="checkbox"/> Topical Treatments<br><input type="checkbox"/> Wound Management Systems<br><input type="checkbox"/> Other, please specify<br><input type="text"/> | Yes <input type="checkbox"/> No <input type="checkbox"/>      | Reported?<br>Yes <input type="checkbox"/> No <input type="checkbox"/><br>AE Number<br><input type="text"/> |

| Visit Date                                                                                          | Intervention provided                                                                                                                                                                                                                                                                | Was the patient admitted as an inpatient following the visit? | Adverse Event                                                                                                  |
|-----------------------------------------------------------------------------------------------------|--------------------------------------------------------------------------------------------------------------------------------------------------------------------------------------------------------------------------------------------------------------------------------------|---------------------------------------------------------------|----------------------------------------------------------------------------------------------------------------|
| <input type="text"/> / <input type="text"/> / <input type="text"/><br><small>Day Month Year</small> | <input type="checkbox"/> Antibiotic <input type="checkbox"/> Analgesia <input type="checkbox"/> Larvae<br><input type="checkbox"/> Topical Treatments<br><input type="checkbox"/> Wound Management Systems<br><input type="checkbox"/> Other, please specify<br><input type="text"/> | Yes <input type="checkbox"/> No <input type="checkbox"/>      | Reported?<br>Yes <input type="checkbox"/> No <input type="checkbox"/><br><br>AE Number<br><input type="text"/> |
| <input type="text"/> / <input type="text"/> / <input type="text"/><br><small>Day Month Year</small> | <input type="checkbox"/> Antibiotic <input type="checkbox"/> Analgesia <input type="checkbox"/> Larvae<br><input type="checkbox"/> Topical Treatments<br><input type="checkbox"/> Wound Management Systems<br><input type="checkbox"/> Other, please specify<br><input type="text"/> | Yes <input type="checkbox"/> No <input type="checkbox"/>      | Reported?<br>Yes <input type="checkbox"/> No <input type="checkbox"/><br><br>AE Number<br><input type="text"/> |
| <input type="text"/> / <input type="text"/> / <input type="text"/><br><small>Day Month Year</small> | <input type="checkbox"/> Antibiotic <input type="checkbox"/> Analgesia <input type="checkbox"/> Larvae<br><input type="checkbox"/> Topical Treatments<br><input type="checkbox"/> Wound Management Systems<br><input type="checkbox"/> Other, please specify<br><input type="text"/> | Yes <input type="checkbox"/> No <input type="checkbox"/>      | Reported?<br>Yes <input type="checkbox"/> No <input type="checkbox"/><br><br>AE Number<br><input type="text"/> |

Form Completed by:

Name: \_\_\_\_\_

Assessor ID:

Date:  /  /  20   
Day Month Year
