# Supplementary material
Source: PubMed Central journal article supplement (PMC8547049)
Supplement: 13063_2021_5662_MOESM8_ESM.pdf [file 13063_2021_5662_MOESM8_ESM.pdf]

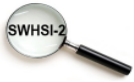

**SWHSI-2 Supplementary Page for Infection  
CDC Assessment**

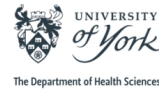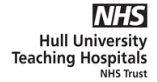

Please continue to record any infection episodes (in addition to those recorded in the Post Healing Assessment CRF).

**THIS SECTION MUST NOT BE COMPLETED FOR INFECTIONS PREVIOUSLY REPORTED IN THE POST HEALING ASSESSMENT CRF.**

Site ID:  Participant ID:

Infection Start Date:  /  /   Exact  Approx  
dd mm yyyy

- Abscess or other evidence of infection detected on gross anatomical or hisopathologic exam or imaging test
- Aspirated fluid/swab of surgical site yields organisms and pus cells are present
- Clinician's diagnosis
- Fever (temperature 38°C or more)
- Heat
- Incision spontaneously dehiscd or was opened by healthcare professional
- Localised pain and tenderness
- Localised swelling
- Purulent drainage
- Redness

Infection Start Date:  /  /   Exact  Approx  
dd mm yyyy

- Abscess or other evidence of infection detected on gross anatomical or hisopathologic exam or imaging test
- Aspirated fluid/swab of surgical site yields organisms and pus cells are present
- Clinician's diagnosis
- Fever (temperature 38°C or more)
- Heat
- Incision spontaneously dehiscd or was opened by healthcare professional
- Localised pain and tenderness
- Localised swelling
- Purulent drainage
- Redness

Infection Start Date:  /  /   Exact  Approx  
dd mm yyyy

- Abscess or other evidence of infection detected on gross anatomical or hisopathologic exam or imaging test
- Aspirated fluid/swab of surgical site yields organisms and pus cells are present
- Clinician's diagnosis
- Fever (temperature 38°C or more)
- Heat
- Incision spontaneously dehiscd or was opened by healthcare professional
- Localised pain and tenderness
- Localised swelling
- Purulent drainage
- Redness

Infection Start Date:   /   /      Exact  Approx

- Abscess or other evidence of infection detected on gross anatomical or hisopathologic exam or imaging test
- Aspirated fluid/swab of surgical site yields organisms and pus cells are present
- Clinician's diagnosis
- Fever (temperature 38°C or more)
- Heat
- Incision spontaneously dehiscid or was opened by healthcare professional
- Localised pain and tenderness
- Localised swelling
- Purulent drainage
- Redness

Infection Start Date:   /   /      Exact  Approx

- Abscess or other evidence of infection detected on gross anatomical or hisopathologic exam or imaging test
- Aspirated fluid/swab of surgical site yields organisms and pus cells are present
- Clinician's diagnosis
- Fever (temperature 38°C or more)
- Heat
- Incision spontaneously dehiscid or was opened by healthcare professional
- Localised pain and tenderness
- Localised swelling
- Purulent drainage
- Redness

Infection Start Date:   /   /      Exact  Approx

- Abscess or other evidence of infection detected on gross anatomical or hisopathologic exam or imaging test
- Aspirated fluid/swab of surgical site yields organisms and pus cells are present
- Clinician's diagnosis
- Fever (temperature 38°C or more)
- Heat
- Incision spontaneously dehiscid or was opened by healthcare professional
- Localised pain and tenderness
- Localised swelling
- Purulent drainage
- Redness

Signature of person completing page:

Date (dd/mm/yyyy):  
  /   /

Assessor ID:
