# Supplementary material
Source: PubMed Central journal article supplement (PMC8547049)
Supplement: 13063_2021_5662_MOESM12_ESM.pdf [file 13063_2021_5662_MOESM12_ESM.pdf]

**SWHSI-2 Trial**

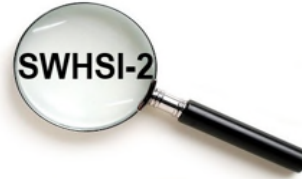

**12 Month Resource Use - Case Report Form  
FOR STUDY INVESTIGATOR COMPLETION**

Site ID:  Participant Study Number:

CRF Completion Date:  /  / 20  
*Day Month Year*

This project was funded by the National Institute for Health Research Health Technology Assessment Programme (Project number 17/42/94)

This Case Report Form (CRF) may be completed by the Principal Investigator or a delegated member of staff listed on the SWHSI-2 Trial Delegation Log.

Please refer to the associated SWHSI-2 Trial Specific Procedure for full details of how to complete this CRF.

Please complete all sections of this CRF using the spaces provided, and sign off when complete. Please do not include any patient identifiable information when completing this CRF.

When complete, please remove the staple and take a photocopy of the complete CRF for your site records. **Please do not re-staple the original.** Place the unstapled original in a "SWHSI-2 Trial business reply envelope" and send via post to York Trials Unit.

Participant ID:

**Section A**

Did this participant withdraw from nurse follow up (telephone and/or healing follow up) during the study?  Yes  No

If No, proceed to Section B

If Yes, do patient medical records confirm that the participant's wound healed at any time during the last 12 months?  Yes  No

If Yes, please provide the date of confirmed wound healing:  /  /   
*Day Month Year*

If No, does the participant's treating healthcare professional deem the wound to have healed at any time during the last 12 months?  Yes  No

If Yes, please provide the date the healthcare professional confirmed wound healing:  /  /   
*Day Month Year*

*Proceed to Section B*

Participant ID:

**Section B - Medications**

Has the participant been prescribed any medications in the last 12 months for the treatment of their wound?  Yes  No

If Yes, please provide a Yes/No response for **all** of the medications listed below and record the total quantity they were prescribed.

If No, please proceed to Section C.

| Drug        | Yes                      | No                       | Route of Administration                                                                                                                                                                                                                                                      | Quantity Unit                                                                                                                                                                  | Frequency                                                                                                                                                                                                                                                      | Total Quantity Prescribed                                      |
|-------------|--------------------------|--------------------------|------------------------------------------------------------------------------------------------------------------------------------------------------------------------------------------------------------------------------------------------------------------------------|--------------------------------------------------------------------------------------------------------------------------------------------------------------------------------|----------------------------------------------------------------------------------------------------------------------------------------------------------------------------------------------------------------------------------------------------------------|----------------------------------------------------------------|
| Analgesia 1 | <input type="checkbox"/> | <input type="checkbox"/> | <input type="checkbox"/> Oral <input type="checkbox"/> Subcutaneous<br><input type="checkbox"/> IV <input type="checkbox"/> Nasal<br><input type="checkbox"/> IM <input type="checkbox"/> Topical<br><input type="checkbox"/> Other (Please specify)<br><input type="text"/> | <input type="checkbox"/> Tablet<br><input type="checkbox"/> Sachet<br><input type="checkbox"/> Vial<br><input type="checkbox"/> Other (Please specify)<br><input type="text"/> | <input type="checkbox"/> Once daily <input type="checkbox"/> Twice weekly<br><input type="checkbox"/> Twice daily <input type="checkbox"/> PRN<br><input type="checkbox"/> Once weekly <input type="checkbox"/> Other (Please specify)<br><input type="text"/> | <input type="text"/> <input type="text"/> <input type="text"/> |
| Analgesia 2 | <input type="checkbox"/> | <input type="checkbox"/> | <input type="checkbox"/> Oral <input type="checkbox"/> Subcutaneous<br><input type="checkbox"/> IV <input type="checkbox"/> Nasal<br><input type="checkbox"/> IM <input type="checkbox"/> Topical<br><input type="checkbox"/> Other (Please specify)<br><input type="text"/> | <input type="checkbox"/> Tablet<br><input type="checkbox"/> Sachet<br><input type="checkbox"/> Vial<br><input type="checkbox"/> Other (Please specify)<br><input type="text"/> | <input type="checkbox"/> Once daily <input type="checkbox"/> Twice weekly<br><input type="checkbox"/> Twice daily <input type="checkbox"/> PRN<br><input type="checkbox"/> Once weekly <input type="checkbox"/> Other (Please specify)<br><input type="text"/> | <input type="text"/> <input type="text"/> <input type="text"/> |
| Analgesia 3 | <input type="checkbox"/> | <input type="checkbox"/> | <input type="checkbox"/> Oral <input type="checkbox"/> Subcutaneous<br><input type="checkbox"/> IV <input type="checkbox"/> Nasal<br><input type="checkbox"/> IM <input type="checkbox"/> Topical<br><input type="checkbox"/> Other (Please specify)<br><input type="text"/> | <input type="checkbox"/> Tablet<br><input type="checkbox"/> Sachet<br><input type="checkbox"/> Vial<br><input type="checkbox"/> Other (Please specify)<br><input type="text"/> | <input type="checkbox"/> Once daily <input type="checkbox"/> Twice weekly<br><input type="checkbox"/> Twice daily <input type="checkbox"/> PRN<br><input type="checkbox"/> Once weekly <input type="checkbox"/> Other (Please specify)<br><input type="text"/> | <input type="text"/> <input type="text"/> <input type="text"/> |

Participant ID:

| Drug          | Yes                      | No                       | Route of Administration                                                                                                                                                                                                                                                      | Quantity Unit                                                                                                                                                                  | Frequency                                                                                                                                                                                                                                                      | Total Quantity Prescribed                                      |
|---------------|--------------------------|--------------------------|------------------------------------------------------------------------------------------------------------------------------------------------------------------------------------------------------------------------------------------------------------------------------|--------------------------------------------------------------------------------------------------------------------------------------------------------------------------------|----------------------------------------------------------------------------------------------------------------------------------------------------------------------------------------------------------------------------------------------------------------|----------------------------------------------------------------|
| Analgesia 4   | <input type="checkbox"/> | <input type="checkbox"/> | <input type="checkbox"/> Oral <input type="checkbox"/> Subcutaneous<br><input type="checkbox"/> IV <input type="checkbox"/> Nasal<br><input type="checkbox"/> IM <input type="checkbox"/> Topical<br><input type="checkbox"/> Other (Please specify)<br><input type="text"/> | <input type="checkbox"/> Tablet<br><input type="checkbox"/> Sachet<br><input type="checkbox"/> Vial<br><input type="checkbox"/> Other (Please specify)<br><input type="text"/> | <input type="checkbox"/> Once daily <input type="checkbox"/> Twice weekly<br><input type="checkbox"/> Twice daily <input type="checkbox"/> PRN<br><input type="checkbox"/> Once weekly <input type="checkbox"/> Other (Please specify)<br><input type="text"/> | <input type="text"/> <input type="text"/> <input type="text"/> |
| Anticoagulant | <input type="checkbox"/> | <input type="checkbox"/> | <input type="checkbox"/> Oral <input type="checkbox"/> Subcutaneous<br><input type="checkbox"/> IV <input type="checkbox"/> Nasal<br><input type="checkbox"/> IM <input type="checkbox"/> Topical<br><input type="checkbox"/> Other (Please specify)<br><input type="text"/> | <input type="checkbox"/> Tablet<br><input type="checkbox"/> Sachet<br><input type="checkbox"/> Vial<br><input type="checkbox"/> Other (Please specify)<br><input type="text"/> | <input type="checkbox"/> Once daily <input type="checkbox"/> Twice weekly<br><input type="checkbox"/> Twice daily <input type="checkbox"/> PRN<br><input type="checkbox"/> Once weekly <input type="checkbox"/> Other (Please specify)<br><input type="text"/> | <input type="text"/> <input type="text"/> <input type="text"/> |
| Antibiotic 1  | <input type="checkbox"/> | <input type="checkbox"/> | <input type="checkbox"/> Oral <input type="checkbox"/> Subcutaneous<br><input type="checkbox"/> IV <input type="checkbox"/> Nasal<br><input type="checkbox"/> IM <input type="checkbox"/> Topical<br><input type="checkbox"/> Other (Please specify)<br><input type="text"/> | <input type="checkbox"/> Tablet<br><input type="checkbox"/> Sachet<br><input type="checkbox"/> Vial<br><input type="checkbox"/> Other (Please specify)<br><input type="text"/> | <input type="checkbox"/> Once daily <input type="checkbox"/> Twice weekly<br><input type="checkbox"/> Twice daily <input type="checkbox"/> PRN<br><input type="checkbox"/> Once weekly <input type="checkbox"/> Other (Please specify)<br><input type="text"/> | <input type="text"/> <input type="text"/> <input type="text"/> |
| Antibiotic 2  | <input type="checkbox"/> | <input type="checkbox"/> | <input type="checkbox"/> Oral <input type="checkbox"/> Subcutaneous<br><input type="checkbox"/> IV <input type="checkbox"/> Nasal<br><input type="checkbox"/> IM <input type="checkbox"/> Topical<br><input type="checkbox"/> Other (Please specify)<br><input type="text"/> | <input type="checkbox"/> Tablet<br><input type="checkbox"/> Sachet<br><input type="checkbox"/> Vial<br><input type="checkbox"/> Other (Please specify)<br><input type="text"/> | <input type="checkbox"/> Once daily <input type="checkbox"/> Twice weekly<br><input type="checkbox"/> Twice daily <input type="checkbox"/> PRN<br><input type="checkbox"/> Once weekly <input type="checkbox"/> Other (Please specify)<br><input type="text"/> | <input type="text"/> <input type="text"/> <input type="text"/> |

Participant ID:

| Drug           | Yes                      | No                       | Route of Administration                                                                                                                                                                                                                                                      | Quantity Unit                                                                                                                                                                  | Frequency                                                                                                                                                                                                                                                      | Total Quantity Prescribed                                      |
|----------------|--------------------------|--------------------------|------------------------------------------------------------------------------------------------------------------------------------------------------------------------------------------------------------------------------------------------------------------------------|--------------------------------------------------------------------------------------------------------------------------------------------------------------------------------|----------------------------------------------------------------------------------------------------------------------------------------------------------------------------------------------------------------------------------------------------------------|----------------------------------------------------------------|
| Antibiotic 3   | <input type="checkbox"/> | <input type="checkbox"/> | <input type="checkbox"/> Oral <input type="checkbox"/> Subcutaneous<br><input type="checkbox"/> IV <input type="checkbox"/> Nasal<br><input type="checkbox"/> IM <input type="checkbox"/> Topical<br><input type="checkbox"/> Other (Please specify)<br><input type="text"/> | <input type="checkbox"/> Tablet<br><input type="checkbox"/> Sachet<br><input type="checkbox"/> Vial<br><input type="checkbox"/> Other (Please specify)<br><input type="text"/> | <input type="checkbox"/> Once daily <input type="checkbox"/> Twice weekly<br><input type="checkbox"/> Twice daily <input type="checkbox"/> PRN<br><input type="checkbox"/> Once weekly <input type="checkbox"/> Other (Please specify)<br><input type="text"/> | <input type="text"/> <input type="text"/> <input type="text"/> |
| Antibiotic 4   | <input type="checkbox"/> | <input type="checkbox"/> | <input type="checkbox"/> Oral <input type="checkbox"/> Subcutaneous<br><input type="checkbox"/> IV <input type="checkbox"/> Nasal<br><input type="checkbox"/> IM <input type="checkbox"/> Topical<br><input type="checkbox"/> Other (Please specify)<br><input type="text"/> | <input type="checkbox"/> Tablet<br><input type="checkbox"/> Sachet<br><input type="checkbox"/> Vial<br><input type="checkbox"/> Other (Please specify)<br><input type="text"/> | <input type="checkbox"/> Once daily <input type="checkbox"/> Twice weekly<br><input type="checkbox"/> Twice daily <input type="checkbox"/> PRN<br><input type="checkbox"/> Once weekly <input type="checkbox"/> Other (Please specify)<br><input type="text"/> | <input type="text"/> <input type="text"/> <input type="text"/> |
| Antiplatelet   | <input type="checkbox"/> | <input type="checkbox"/> | <input type="checkbox"/> Oral <input type="checkbox"/> Subcutaneous<br><input type="checkbox"/> IV <input type="checkbox"/> Nasal<br><input type="checkbox"/> IM <input type="checkbox"/> Topical<br><input type="checkbox"/> Other (Please specify)<br><input type="text"/> | <input type="checkbox"/> Tablet<br><input type="checkbox"/> Sachet<br><input type="checkbox"/> Vial<br><input type="checkbox"/> Other (Please specify)<br><input type="text"/> | <input type="checkbox"/> Once daily <input type="checkbox"/> Twice weekly<br><input type="checkbox"/> Twice daily <input type="checkbox"/> PRN<br><input type="checkbox"/> Once weekly <input type="checkbox"/> Other (Please specify)<br><input type="text"/> | <input type="text"/> <input type="text"/> <input type="text"/> |
| Corticosteroid | <input type="checkbox"/> | <input type="checkbox"/> | <input type="checkbox"/> Oral <input type="checkbox"/> Subcutaneous<br><input type="checkbox"/> IV <input type="checkbox"/> Nasal<br><input type="checkbox"/> IM <input type="checkbox"/> Topical<br><input type="checkbox"/> Other (Please specify)<br><input type="text"/> | <input type="checkbox"/> Tablet<br><input type="checkbox"/> Sachet<br><input type="checkbox"/> Vial<br><input type="checkbox"/> Other (Please specify)<br><input type="text"/> | <input type="checkbox"/> Once daily <input type="checkbox"/> Twice weekly<br><input type="checkbox"/> Twice daily <input type="checkbox"/> PRN<br><input type="checkbox"/> Once weekly <input type="checkbox"/> Other (Please specify)<br><input type="text"/> | <input type="text"/> <input type="text"/> <input type="text"/> |

Participant ID:

| Drug              | Yes                      | No                       | Route of Administration                                                                                                                                                                                                                                                      | Quantity Unit                                                                                                                                                                  | Frequency                                                                                                                                                                                                                                                      | Total Quantity Prescribed                                      |
|-------------------|--------------------------|--------------------------|------------------------------------------------------------------------------------------------------------------------------------------------------------------------------------------------------------------------------------------------------------------------------|--------------------------------------------------------------------------------------------------------------------------------------------------------------------------------|----------------------------------------------------------------------------------------------------------------------------------------------------------------------------------------------------------------------------------------------------------------|----------------------------------------------------------------|
| Cytotoxic         | <input type="checkbox"/> | <input type="checkbox"/> | <input type="checkbox"/> Oral <input type="checkbox"/> Subcutaneous<br><input type="checkbox"/> IV <input type="checkbox"/> Nasal<br><input type="checkbox"/> IM <input type="checkbox"/> Topical<br><input type="checkbox"/> Other (Please specify)<br><input type="text"/> | <input type="checkbox"/> Tablet<br><input type="checkbox"/> Sachet<br><input type="checkbox"/> Vial<br><input type="checkbox"/> Other (Please specify)<br><input type="text"/> | <input type="checkbox"/> Once daily <input type="checkbox"/> Twice weekly<br><input type="checkbox"/> Twice daily <input type="checkbox"/> PRN<br><input type="checkbox"/> Once weekly <input type="checkbox"/> Other (Please specify)<br><input type="text"/> | <input type="text"/> <input type="text"/> <input type="text"/> |
| Immunosuppressant | <input type="checkbox"/> | <input type="checkbox"/> | <input type="checkbox"/> Oral <input type="checkbox"/> Subcutaneous<br><input type="checkbox"/> IV <input type="checkbox"/> Nasal<br><input type="checkbox"/> IM <input type="checkbox"/> Topical<br><input type="checkbox"/> Other (Please specify)<br><input type="text"/> | <input type="checkbox"/> Tablet<br><input type="checkbox"/> Sachet<br><input type="checkbox"/> Vial<br><input type="checkbox"/> Other (Please specify)<br><input type="text"/> | <input type="checkbox"/> Once daily <input type="checkbox"/> Twice weekly<br><input type="checkbox"/> Twice daily <input type="checkbox"/> PRN<br><input type="checkbox"/> Once weekly <input type="checkbox"/> Other (Please specify)<br><input type="text"/> | <input type="text"/> <input type="text"/> <input type="text"/> |
| NSAID             | <input type="checkbox"/> | <input type="checkbox"/> | <input type="checkbox"/> Oral <input type="checkbox"/> Subcutaneous<br><input type="checkbox"/> IV <input type="checkbox"/> Nasal<br><input type="checkbox"/> IM <input type="checkbox"/> Topical<br><input type="checkbox"/> Other (Please specify)<br><input type="text"/> | <input type="checkbox"/> Tablet<br><input type="checkbox"/> Sachet<br><input type="checkbox"/> Vial<br><input type="checkbox"/> Other (Please specify)<br><input type="text"/> | <input type="checkbox"/> Once daily <input type="checkbox"/> Twice weekly<br><input type="checkbox"/> Twice daily <input type="checkbox"/> PRN<br><input type="checkbox"/> Once weekly <input type="checkbox"/> Other (Please specify)<br><input type="text"/> | <input type="text"/> <input type="text"/> <input type="text"/> |
| Vasodilator       | <input type="checkbox"/> | <input type="checkbox"/> | <input type="checkbox"/> Oral <input type="checkbox"/> Subcutaneous<br><input type="checkbox"/> IV <input type="checkbox"/> Nasal<br><input type="checkbox"/> IM <input type="checkbox"/> Topical<br><input type="checkbox"/> Other (Please specify)<br><input type="text"/> | <input type="checkbox"/> Tablet<br><input type="checkbox"/> Sachet<br><input type="checkbox"/> Vial<br><input type="checkbox"/> Other (Please specify)<br><input type="text"/> | <input type="checkbox"/> Once daily <input type="checkbox"/> Twice weekly<br><input type="checkbox"/> Twice daily <input type="checkbox"/> PRN<br><input type="checkbox"/> Once weekly <input type="checkbox"/> Other (Please specify)<br><input type="text"/> | <input type="text"/> <input type="text"/> <input type="text"/> |

Participant ID:

| Drug                                           | Yes                      | No                       | Route of Administration                                                                                                                                                                                                                                                      | Quantity Unit                                                                                                                                                                  | Frequency                                                                                                                                                                                                                                                      | Total Quantity Prescribed                                      |
|------------------------------------------------|--------------------------|--------------------------|------------------------------------------------------------------------------------------------------------------------------------------------------------------------------------------------------------------------------------------------------------------------------|--------------------------------------------------------------------------------------------------------------------------------------------------------------------------------|----------------------------------------------------------------------------------------------------------------------------------------------------------------------------------------------------------------------------------------------------------------|----------------------------------------------------------------|
| Other (please specify)<br><input type="text"/> | <input type="checkbox"/> | <input type="checkbox"/> | <input type="checkbox"/> Oral <input type="checkbox"/> Subcutaneous<br><input type="checkbox"/> IV <input type="checkbox"/> Nasal<br><input type="checkbox"/> IM <input type="checkbox"/> Topical<br><input type="checkbox"/> Other (Please specify)<br><input type="text"/> | <input type="checkbox"/> Tablet<br><input type="checkbox"/> Sachet<br><input type="checkbox"/> Vial<br><input type="checkbox"/> Other (Please specify)<br><input type="text"/> | <input type="checkbox"/> Once daily <input type="checkbox"/> Twice weekly<br><input type="checkbox"/> Twice daily <input type="checkbox"/> PRN<br><input type="checkbox"/> Once weekly <input type="checkbox"/> Other (Please specify)<br><input type="text"/> | <input type="text"/> <input type="text"/> <input type="text"/> |
| Other (please specify)<br><input type="text"/> | <input type="checkbox"/> | <input type="checkbox"/> | <input type="checkbox"/> Oral <input type="checkbox"/> Subcutaneous<br><input type="checkbox"/> IV <input type="checkbox"/> Nasal<br><input type="checkbox"/> IM <input type="checkbox"/> Topical<br><input type="checkbox"/> Other (Please specify)<br><input type="text"/> | <input type="checkbox"/> Tablet<br><input type="checkbox"/> Sachet<br><input type="checkbox"/> Vial<br><input type="checkbox"/> Other (Please specify)<br><input type="text"/> | <input type="checkbox"/> Once daily <input type="checkbox"/> Twice weekly<br><input type="checkbox"/> Twice daily <input type="checkbox"/> PRN<br><input type="checkbox"/> Once weekly <input type="checkbox"/> Other (Please specify)<br><input type="text"/> | <input type="text"/> <input type="text"/> <input type="text"/> |
| Other (please specify)<br><input type="text"/> | <input type="checkbox"/> | <input type="checkbox"/> | <input type="checkbox"/> Oral <input type="checkbox"/> Subcutaneous<br><input type="checkbox"/> IV <input type="checkbox"/> Nasal<br><input type="checkbox"/> IM <input type="checkbox"/> Topical<br><input type="checkbox"/> Other (Please specify)<br><input type="text"/> | <input type="checkbox"/> Tablet<br><input type="checkbox"/> Sachet<br><input type="checkbox"/> Vial<br><input type="checkbox"/> Other (Please specify)<br><input type="text"/> | <input type="checkbox"/> Once daily <input type="checkbox"/> Twice weekly<br><input type="checkbox"/> Twice daily <input type="checkbox"/> PRN<br><input type="checkbox"/> Once weekly <input type="checkbox"/> Other (Please specify)<br><input type="text"/> | <input type="text"/> <input type="text"/> <input type="text"/> |
| Other (please specify)<br><input type="text"/> | <input type="checkbox"/> | <input type="checkbox"/> | <input type="checkbox"/> Oral <input type="checkbox"/> Subcutaneous<br><input type="checkbox"/> IV <input type="checkbox"/> Nasal<br><input type="checkbox"/> IM <input type="checkbox"/> Topical<br><input type="checkbox"/> Other (Please specify)<br><input type="text"/> | <input type="checkbox"/> Tablet<br><input type="checkbox"/> Sachet<br><input type="checkbox"/> Vial<br><input type="checkbox"/> Other (Please specify)<br><input type="text"/> | <input type="checkbox"/> Once daily <input type="checkbox"/> Twice weekly<br><input type="checkbox"/> Twice daily <input type="checkbox"/> PRN<br><input type="checkbox"/> Once weekly <input type="checkbox"/> Other (Please specify)<br><input type="text"/> | <input type="text"/> <input type="text"/> <input type="text"/> |

Please proceed to Section C

Participant ID:

**Section C - Inpatient Admissions**

Has the participant had any inpatient admissions in the past 12 months in relation to their wound?  Yes  No

If Yes, please complete the information below for each admission.

If No, please proceed to section D.

| Admission Date                                                                                      | Surgical Intervention Provided                                                                                                                                                                                                                                                                                                                                                                                                                                                                                      | Other Treatment Provided                                                                                                                                                                                                                                                                                                                                                                                                                                                | Discharge Date                                                                                      | Adverse Event                                                                                                           |
|-----------------------------------------------------------------------------------------------------|---------------------------------------------------------------------------------------------------------------------------------------------------------------------------------------------------------------------------------------------------------------------------------------------------------------------------------------------------------------------------------------------------------------------------------------------------------------------------------------------------------------------|-------------------------------------------------------------------------------------------------------------------------------------------------------------------------------------------------------------------------------------------------------------------------------------------------------------------------------------------------------------------------------------------------------------------------------------------------------------------------|-----------------------------------------------------------------------------------------------------|-------------------------------------------------------------------------------------------------------------------------|
| <input type="text"/> / <input type="text"/> / <input type="text"/><br><small>Day Month Year</small> | <p style="text-align: center;">Yes <input type="checkbox"/> No <input type="checkbox"/></p> <p style="text-align: center;">If Yes, please tick all that apply:</p> <p>Amputation <input type="checkbox"/> Angloplasty <input type="checkbox"/></p> <p>Incision &amp; Drainage <input type="checkbox"/> Debridement <input type="checkbox"/></p> <p>Revascularisation <input type="checkbox"/> Wound Closure <input type="checkbox"/></p> <p><input type="checkbox"/> Other, please specify</p> <input type="text"/> | <p style="text-align: center;">Yes <input type="checkbox"/> No <input type="checkbox"/></p> <p style="text-align: center;">If Yes, please tick all that apply:</p> <p>Analgesia <input type="checkbox"/> Antibiotic <input type="checkbox"/></p> <p>Larvae <input type="checkbox"/> Topical Treatments <input type="checkbox"/></p> <p>Wound Management Systems <input type="checkbox"/></p> <p><input type="checkbox"/> Other, please specify</p> <input type="text"/> | <input type="text"/> / <input type="text"/> / <input type="text"/><br><small>Day Month Year</small> | <p>Reported?<br/>Yes <input type="checkbox"/> No <input type="checkbox"/></p> <p>AE Number<br/><input type="text"/></p> |
| <input type="text"/> / <input type="text"/> / <input type="text"/><br><small>Day Month Year</small> | <p style="text-align: center;">Yes <input type="checkbox"/> No <input type="checkbox"/></p> <p style="text-align: center;">If Yes, please tick all that apply:</p> <p>Amputation <input type="checkbox"/> Angloplasty <input type="checkbox"/></p> <p>Incision &amp; Drainage <input type="checkbox"/> Debridement <input type="checkbox"/></p> <p>Revascularisation <input type="checkbox"/> Wound Closure <input type="checkbox"/></p> <p><input type="checkbox"/> Other, please specify</p> <input type="text"/> | <p style="text-align: center;">Yes <input type="checkbox"/> No <input type="checkbox"/></p> <p style="text-align: center;">If Yes, please tick all that apply:</p> <p>Analgesia <input type="checkbox"/> Antibiotic <input type="checkbox"/></p> <p>Larvae <input type="checkbox"/> Topical Treatments <input type="checkbox"/></p> <p>Wound Management Systems <input type="checkbox"/></p> <p><input type="checkbox"/> Other, please specify</p> <input type="text"/> | <input type="text"/> / <input type="text"/> / <input type="text"/><br><small>Day Month Year</small> | <p>Reported?<br/>Yes <input type="checkbox"/> No <input type="checkbox"/></p> <p>AE Number<br/><input type="text"/></p> |



Participant ID:

| Admission Date                                                                                      | Surgical Intervention Provided                                                                                                                                                                                                                                                                                                                                                                                                                                                                                                                         | Other Treatment Provided                                                                                                                                                                                                                                                                                                                                                                                                                                                                                   | Discharge Date                                                                                      | Adverse Event                                                                                                           |
|-----------------------------------------------------------------------------------------------------|--------------------------------------------------------------------------------------------------------------------------------------------------------------------------------------------------------------------------------------------------------------------------------------------------------------------------------------------------------------------------------------------------------------------------------------------------------------------------------------------------------------------------------------------------------|------------------------------------------------------------------------------------------------------------------------------------------------------------------------------------------------------------------------------------------------------------------------------------------------------------------------------------------------------------------------------------------------------------------------------------------------------------------------------------------------------------|-----------------------------------------------------------------------------------------------------|-------------------------------------------------------------------------------------------------------------------------|
| <input type="text"/> / <input type="text"/> / <input type="text"/><br><small>Day Month Year</small> | <p style="text-align: center;">Yes <input type="checkbox"/> No <input type="checkbox"/></p> <p style="text-align: center;">If Yes, please tick all that apply:</p> <p>Amputation <input type="checkbox"/> Angioplasty <input type="checkbox"/></p> <p>Incision &amp; Drainage <input type="checkbox"/> Debridement <input type="checkbox"/></p> <p>Revascularisation <input type="checkbox"/> Wound Closure <input type="checkbox"/></p> <p><input type="checkbox"/> Other, please specify</p> <input style="width: 100%; height: 20px;" type="text"/> | <p style="text-align: center;">Yes <input type="checkbox"/> No <input type="checkbox"/></p> <p style="text-align: center;">If Yes, please tick all that apply:</p> <p>Analgesia <input type="checkbox"/> Antibiotic <input type="checkbox"/></p> <p>Larvae <input type="checkbox"/> Topical Treatments <input type="checkbox"/></p> <p>Wound Management Systems <input type="checkbox"/></p> <p><input type="checkbox"/> Other, please specify</p> <input style="width: 100%; height: 20px;" type="text"/> | <input type="text"/> / <input type="text"/> / <input type="text"/><br><small>Day Month Year</small> | <p>Reported?<br/>Yes <input type="checkbox"/> No <input type="checkbox"/></p> <p>AE Number<br/><input type="text"/></p> |
| <input type="text"/> / <input type="text"/> / <input type="text"/><br><small>Day Month Year</small> | <p style="text-align: center;">Yes <input type="checkbox"/> No <input type="checkbox"/></p> <p style="text-align: center;">If Yes, please tick all that apply:</p> <p>Amputation <input type="checkbox"/> Angioplasty <input type="checkbox"/></p> <p>Incision &amp; Drainage <input type="checkbox"/> Debridement <input type="checkbox"/></p> <p>Revascularisation <input type="checkbox"/> Wound Closure <input type="checkbox"/></p> <p><input type="checkbox"/> Other, please specify</p> <input style="width: 100%; height: 20px;" type="text"/> | <p style="text-align: center;">Yes <input type="checkbox"/> No <input type="checkbox"/></p> <p style="text-align: center;">If Yes, please tick all that apply:</p> <p>Analgesia <input type="checkbox"/> Antibiotic <input type="checkbox"/></p> <p>Larvae <input type="checkbox"/> Topical Treatments <input type="checkbox"/></p> <p>Wound Management Systems <input type="checkbox"/></p> <p><input type="checkbox"/> Other, please specify</p> <input style="width: 100%; height: 20px;" type="text"/> | <input type="text"/> / <input type="text"/> / <input type="text"/><br><small>Day Month Year</small> | <p>Reported?<br/>Yes <input type="checkbox"/> No <input type="checkbox"/></p> <p>AE Number<br/><input type="text"/></p> |
| <input type="text"/> / <input type="text"/> / <input type="text"/><br><small>Day Month Year</small> | <p style="text-align: center;">Yes <input type="checkbox"/> No <input type="checkbox"/></p> <p style="text-align: center;">If Yes, please tick all that apply:</p> <p>Amputation <input type="checkbox"/> Angioplasty <input type="checkbox"/></p> <p>Incision &amp; Drainage <input type="checkbox"/> Debridement <input type="checkbox"/></p> <p>Revascularisation <input type="checkbox"/> Wound Closure <input type="checkbox"/></p> <p><input type="checkbox"/> Other, please specify</p> <input style="width: 100%; height: 20px;" type="text"/> | <p style="text-align: center;">Yes <input type="checkbox"/> No <input type="checkbox"/></p> <p style="text-align: center;">If Yes, please tick all that apply:</p> <p>Analgesia <input type="checkbox"/> Antibiotic <input type="checkbox"/></p> <p>Larvae <input type="checkbox"/> Topical Treatments <input type="checkbox"/></p> <p>Wound Management Systems <input type="checkbox"/></p> <p><input type="checkbox"/> Other, please specify</p> <input style="width: 100%; height: 20px;" type="text"/> | <input type="text"/> / <input type="text"/> / <input type="text"/><br><small>Day Month Year</small> | <p>Reported?<br/>Yes <input type="checkbox"/> No <input type="checkbox"/></p> <p>AE Number<br/><input type="text"/></p> |

Participant ID:

| Admission Date                                                                                      | Surgical Intervention Provided                                                                                                                                                                                                                                                                                                                                                                                                                                                                                                                         | Other Treatment Provided                                                                                                                                                                                                                                                                                                                                                                                                                                                                                   | Discharge Date                                                                                      | Adverse Event                                                                                                           |
|-----------------------------------------------------------------------------------------------------|--------------------------------------------------------------------------------------------------------------------------------------------------------------------------------------------------------------------------------------------------------------------------------------------------------------------------------------------------------------------------------------------------------------------------------------------------------------------------------------------------------------------------------------------------------|------------------------------------------------------------------------------------------------------------------------------------------------------------------------------------------------------------------------------------------------------------------------------------------------------------------------------------------------------------------------------------------------------------------------------------------------------------------------------------------------------------|-----------------------------------------------------------------------------------------------------|-------------------------------------------------------------------------------------------------------------------------|
| <input type="text"/> / <input type="text"/> / <input type="text"/><br><small>Day Month Year</small> | <p style="text-align: center;">Yes <input type="checkbox"/> No <input type="checkbox"/></p> <p style="text-align: center;">If Yes, please tick all that apply:</p> <p>Amputation <input type="checkbox"/> Angioplasty <input type="checkbox"/></p> <p>Incision &amp; Drainage <input type="checkbox"/> Debridement <input type="checkbox"/></p> <p>Revascularisation <input type="checkbox"/> Wound Closure <input type="checkbox"/></p> <p><input type="checkbox"/> Other, please specify</p> <input style="width: 100%; height: 20px;" type="text"/> | <p style="text-align: center;">Yes <input type="checkbox"/> No <input type="checkbox"/></p> <p style="text-align: center;">If Yes, please tick all that apply:</p> <p>Analgesia <input type="checkbox"/> Antibiotic <input type="checkbox"/></p> <p>Larvae <input type="checkbox"/> Topical Treatments <input type="checkbox"/></p> <p>Wound Management Systems <input type="checkbox"/></p> <p><input type="checkbox"/> Other, please specify</p> <input style="width: 100%; height: 20px;" type="text"/> | <input type="text"/> / <input type="text"/> / <input type="text"/><br><small>Day Month Year</small> | <p>Reported?<br/>Yes <input type="checkbox"/> No <input type="checkbox"/></p> <p>AE Number<br/><input type="text"/></p> |
| <input type="text"/> / <input type="text"/> / <input type="text"/><br><small>Day Month Year</small> | <p style="text-align: center;">Yes <input type="checkbox"/> No <input type="checkbox"/></p> <p style="text-align: center;">If Yes, please tick all that apply:</p> <p>Amputation <input type="checkbox"/> Angioplasty <input type="checkbox"/></p> <p>Incision &amp; Drainage <input type="checkbox"/> Debridement <input type="checkbox"/></p> <p>Revascularisation <input type="checkbox"/> Wound Closure <input type="checkbox"/></p> <p><input type="checkbox"/> Other, please specify</p> <input style="width: 100%; height: 20px;" type="text"/> | <p style="text-align: center;">Yes <input type="checkbox"/> No <input type="checkbox"/></p> <p style="text-align: center;">If Yes, please tick all that apply:</p> <p>Analgesia <input type="checkbox"/> Antibiotic <input type="checkbox"/></p> <p>Larvae <input type="checkbox"/> Topical Treatments <input type="checkbox"/></p> <p>Wound Management Systems <input type="checkbox"/></p> <p><input type="checkbox"/> Other, please specify</p> <input style="width: 100%; height: 20px;" type="text"/> | <input type="text"/> / <input type="text"/> / <input type="text"/><br><small>Day Month Year</small> | <p>Reported?<br/>Yes <input type="checkbox"/> No <input type="checkbox"/></p> <p>AE Number<br/><input type="text"/></p> |

**Please provide details of any additional visits using the SWHSI-2 Supplementary Page for Inpatient Admissions.**

*Please proceed to Section D*

Participant ID:

**Section D - Outpatient Visits**

Has the participant had any outpatient visits in the past 12 months in relation to their wound?  Yes  No

If Yes, please complete the questions below for each outpatient visit.

If No, please proceed to section E.

| Visit Date                                                                                                                                                                                                   | Clinic Type                                                                                                                                                                                                                                                                                                                                                                                                                                  | Other Treatment Provided                                                                                                                                                                                                                                                                                                                                                                                                        | Adverse Event                                                                                                                       |
|--------------------------------------------------------------------------------------------------------------------------------------------------------------------------------------------------------------|----------------------------------------------------------------------------------------------------------------------------------------------------------------------------------------------------------------------------------------------------------------------------------------------------------------------------------------------------------------------------------------------------------------------------------------------|---------------------------------------------------------------------------------------------------------------------------------------------------------------------------------------------------------------------------------------------------------------------------------------------------------------------------------------------------------------------------------------------------------------------------------|-------------------------------------------------------------------------------------------------------------------------------------|
| <input type="text"/> <input type="text"/> / <input type="text"/> <input type="text"/> / <input type="text"/> <input type="text"/> <input type="text"/> <input type="text"/><br><small>Day Month Year</small> | Diabetic Foot Clinic <input type="checkbox"/> Occupational Therapy <input type="checkbox"/><br>Pain Management <input type="checkbox"/> Physiotherapy <input type="checkbox"/><br>Podiatry <input type="checkbox"/> Post Surgical Review <input type="checkbox"/><br>Speciality Dressing Clinic <input type="checkbox"/> Tissue Viability <input type="checkbox"/><br>Other, please specify <input type="checkbox"/><br><input type="text"/> | Yes <input type="checkbox"/> No <input type="checkbox"/><br>If Yes, please tick all that apply:<br>Larvae <input type="checkbox"/> Analgesia <input type="checkbox"/> Antibiotic <input type="checkbox"/><br>Dietetic Input <input type="checkbox"/> Topical Treatments <input type="checkbox"/><br>Wound Management Systems <input type="checkbox"/><br>Other, please specify <input type="checkbox"/><br><input type="text"/> | Reported?<br>Yes <input type="checkbox"/> No <input type="checkbox"/><br><br>AE Number<br><input type="text"/> <input type="text"/> |
| <input type="text"/> <input type="text"/> / <input type="text"/> <input type="text"/> / <input type="text"/> <input type="text"/> <input type="text"/> <input type="text"/><br><small>Day Month Year</small> | Diabetic Foot Clinic <input type="checkbox"/> Occupational Therapy <input type="checkbox"/><br>Pain Management <input type="checkbox"/> Physiotherapy <input type="checkbox"/><br>Podiatry <input type="checkbox"/> Post Surgical Review <input type="checkbox"/><br>Speciality Dressing Clinic <input type="checkbox"/> Tissue Viability <input type="checkbox"/><br>Other, please specify <input type="checkbox"/><br><input type="text"/> | Yes <input type="checkbox"/> No <input type="checkbox"/><br>If Yes, please tick all that apply:<br>Larvae <input type="checkbox"/> Analgesia <input type="checkbox"/> Antibiotic <input type="checkbox"/><br>Dietetic Input <input type="checkbox"/> Topical Treatments <input type="checkbox"/><br>Wound Management Systems <input type="checkbox"/><br>Other, please specify <input type="checkbox"/><br><input type="text"/> | Reported?<br>Yes <input type="checkbox"/> No <input type="checkbox"/><br><br>AE Number<br><input type="text"/> <input type="text"/> |

Participant ID:

| Visit Date                                                                                          | Clinic Type                                                                                                                                                                                                                                                                                                                                                                                                                                  | Other Treatment Provided                                                                                                                                                                                                                                                                                                                                                                                                        | Adverse Event                                                                                                  |
|-----------------------------------------------------------------------------------------------------|----------------------------------------------------------------------------------------------------------------------------------------------------------------------------------------------------------------------------------------------------------------------------------------------------------------------------------------------------------------------------------------------------------------------------------------------|---------------------------------------------------------------------------------------------------------------------------------------------------------------------------------------------------------------------------------------------------------------------------------------------------------------------------------------------------------------------------------------------------------------------------------|----------------------------------------------------------------------------------------------------------------|
| <input type="text"/> / <input type="text"/> / <input type="text"/><br><small>Day Month Year</small> | Diabetic Foot Clinic <input type="checkbox"/> Occupational Therapy <input type="checkbox"/><br>Pain Management <input type="checkbox"/> Physiotherapy <input type="checkbox"/><br>Podiatry <input type="checkbox"/> Post Surgical Review <input type="checkbox"/><br>Speciality Dressing Clinic <input type="checkbox"/> Tissue Viability <input type="checkbox"/><br>Other, please specify <input type="checkbox"/><br><input type="text"/> | Yes <input type="checkbox"/> No <input type="checkbox"/><br>If Yes, please tick all that apply:<br>Larvae <input type="checkbox"/> Analgesia <input type="checkbox"/> Antibiotic <input type="checkbox"/><br>Dietetic Input <input type="checkbox"/> Topical Treatments <input type="checkbox"/><br>Wound Management Systems <input type="checkbox"/><br>Other, please specify <input type="checkbox"/><br><input type="text"/> | Reported?<br>Yes <input type="checkbox"/> No <input type="checkbox"/><br><br>AE Number<br><input type="text"/> |
| <input type="text"/> / <input type="text"/> / <input type="text"/><br><small>Day Month Year</small> | Diabetic Foot Clinic <input type="checkbox"/> Occupational Therapy <input type="checkbox"/><br>Pain Management <input type="checkbox"/> Physiotherapy <input type="checkbox"/><br>Podiatry <input type="checkbox"/> Post Surgical Review <input type="checkbox"/><br>Speciality Dressing Clinic <input type="checkbox"/> Tissue Viability <input type="checkbox"/><br>Other, please specify <input type="checkbox"/><br><input type="text"/> | Yes <input type="checkbox"/> No <input type="checkbox"/><br>If Yes, please tick all that apply:<br>Larvae <input type="checkbox"/> Analgesia <input type="checkbox"/> Antibiotic <input type="checkbox"/><br>Dietetic Input <input type="checkbox"/> Topical Treatments <input type="checkbox"/><br>Wound Management Systems <input type="checkbox"/><br>Other, please specify <input type="checkbox"/><br><input type="text"/> | Reported?<br>Yes <input type="checkbox"/> No <input type="checkbox"/><br><br>AE Number<br><input type="text"/> |
| <input type="text"/> / <input type="text"/> / <input type="text"/><br><small>Day Month Year</small> | Diabetic Foot Clinic <input type="checkbox"/> Occupational Therapy <input type="checkbox"/><br>Pain Management <input type="checkbox"/> Physiotherapy <input type="checkbox"/><br>Podiatry <input type="checkbox"/> Post Surgical Review <input type="checkbox"/><br>Speciality Dressing Clinic <input type="checkbox"/> Tissue Viability <input type="checkbox"/><br>Other, please specify <input type="checkbox"/><br><input type="text"/> | Yes <input type="checkbox"/> No <input type="checkbox"/><br>If Yes, please tick all that apply:<br>Larvae <input type="checkbox"/> Analgesia <input type="checkbox"/> Antibiotic <input type="checkbox"/><br>Dietetic Input <input type="checkbox"/> Topical Treatments <input type="checkbox"/><br>Wound Management Systems <input type="checkbox"/><br>Other, please specify <input type="checkbox"/><br><input type="text"/> | Reported?<br>Yes <input type="checkbox"/> No <input type="checkbox"/><br><br>AE Number<br><input type="text"/> |

Participant ID:

| Visit Date                                                                                          | Clinic Type                                                                                                                                                                                                                                                                                                                                                                                                                                  | Other Treatment Provided                                                                                                                                                                                                                                                                                                                                                                                                        | Adverse Event                                                                                              |
|-----------------------------------------------------------------------------------------------------|----------------------------------------------------------------------------------------------------------------------------------------------------------------------------------------------------------------------------------------------------------------------------------------------------------------------------------------------------------------------------------------------------------------------------------------------|---------------------------------------------------------------------------------------------------------------------------------------------------------------------------------------------------------------------------------------------------------------------------------------------------------------------------------------------------------------------------------------------------------------------------------|------------------------------------------------------------------------------------------------------------|
| <input type="text"/> / <input type="text"/> / <input type="text"/><br><small>Day Month Year</small> | Diabetic Foot Clinic <input type="checkbox"/> Occupational Therapy <input type="checkbox"/><br>Pain Management <input type="checkbox"/> Physiotherapy <input type="checkbox"/><br>Podiatry <input type="checkbox"/> Post Surgical Review <input type="checkbox"/><br>Speciality Dressing Clinic <input type="checkbox"/> Tissue Viability <input type="checkbox"/><br>Other, please specify <input type="checkbox"/><br><input type="text"/> | Yes <input type="checkbox"/> No <input type="checkbox"/><br>If Yes, please tick all that apply:<br>Larvae <input type="checkbox"/> Analgesia <input type="checkbox"/> Antibiotic <input type="checkbox"/><br>Dietetic Input <input type="checkbox"/> Topical Treatments <input type="checkbox"/><br>Wound Management Systems <input type="checkbox"/><br>Other, please specify <input type="checkbox"/><br><input type="text"/> | Reported?<br>Yes <input type="checkbox"/> No <input type="checkbox"/><br>AE Number<br><input type="text"/> |
| <input type="text"/> / <input type="text"/> / <input type="text"/><br><small>Day Month Year</small> | Diabetic Foot Clinic <input type="checkbox"/> Occupational Therapy <input type="checkbox"/><br>Pain Management <input type="checkbox"/> Physiotherapy <input type="checkbox"/><br>Podiatry <input type="checkbox"/> Post Surgical Review <input type="checkbox"/><br>Speciality Dressing Clinic <input type="checkbox"/> Tissue Viability <input type="checkbox"/><br>Other, please specify <input type="checkbox"/><br><input type="text"/> | Yes <input type="checkbox"/> No <input type="checkbox"/><br>If Yes, please tick all that apply:<br>Larvae <input type="checkbox"/> Analgesia <input type="checkbox"/> Antibiotic <input type="checkbox"/><br>Dietetic Input <input type="checkbox"/> Topical Treatments <input type="checkbox"/><br>Wound Management Systems <input type="checkbox"/><br>Other, please specify <input type="checkbox"/><br><input type="text"/> | Reported?<br>Yes <input type="checkbox"/> No <input type="checkbox"/><br>AE Number<br><input type="text"/> |

**Please provide details of any additional visits using the SWHSI-2 Supplementary Page for Outpatient Visits.**

*Please proceed to Section E*

Participant ID:

**Section E - Accident & Emergency Visits**

Has the participant had any Accident & Emergency visits in the past 12 months in relation to their wound?  Yes  No

If Yes, please complete the questions below for each Accident & Emergency visit. Please tick all interventions provided at each visit.

If No, please proceed to Section F.

| Visit Date                                                                                                                                                                                                   | Intervention provided                                                                                                                                                                                                                                                                | Was the patient admitted as an inpatient following the visit? | Adverse Event                                                                                                                   |
|--------------------------------------------------------------------------------------------------------------------------------------------------------------------------------------------------------------|--------------------------------------------------------------------------------------------------------------------------------------------------------------------------------------------------------------------------------------------------------------------------------------|---------------------------------------------------------------|---------------------------------------------------------------------------------------------------------------------------------|
| <input type="text"/> <input type="text"/> / <input type="text"/> <input type="text"/> / <input type="text"/> <input type="text"/> <input type="text"/> <input type="text"/><br><small>Day Month Year</small> | <input type="checkbox"/> Antibiotic <input type="checkbox"/> Analgesia <input type="checkbox"/> Larvae<br><input type="checkbox"/> Topical Treatments<br><input type="checkbox"/> Wound Management Systems<br><input type="checkbox"/> Other, please specify<br><input type="text"/> | Yes <input type="checkbox"/> No <input type="checkbox"/>      | Reported?<br>Yes <input type="checkbox"/> No <input type="checkbox"/><br>AE Number<br><input type="text"/> <input type="text"/> |
| <input type="text"/> <input type="text"/> / <input type="text"/> <input type="text"/> / <input type="text"/> <input type="text"/> <input type="text"/> <input type="text"/><br><small>Day Month Year</small> | <input type="checkbox"/> Antibiotic <input type="checkbox"/> Analgesia <input type="checkbox"/> Larvae<br><input type="checkbox"/> Topical Treatments<br><input type="checkbox"/> Wound Management Systems<br><input type="checkbox"/> Other, please specify<br><input type="text"/> | Yes <input type="checkbox"/> No <input type="checkbox"/>      | Reported?<br>Yes <input type="checkbox"/> No <input type="checkbox"/><br>AE Number<br><input type="text"/> <input type="text"/> |
| <input type="text"/> <input type="text"/> / <input type="text"/> <input type="text"/> / <input type="text"/> <input type="text"/> <input type="text"/> <input type="text"/><br><small>Day Month Year</small> | <input type="checkbox"/> Antibiotic <input type="checkbox"/> Analgesia <input type="checkbox"/> Larvae<br><input type="checkbox"/> Topical Treatments<br><input type="checkbox"/> Wound Management Systems<br><input type="checkbox"/> Other, please specify<br><input type="text"/> | Yes <input type="checkbox"/> No <input type="checkbox"/>      | Reported?<br>Yes <input type="checkbox"/> No <input type="checkbox"/><br>AE Number<br><input type="text"/> <input type="text"/> |

Participant ID:

| Visit Date                                                                                          | Intervention provided                                                                                                                                                                                                                                                                | Was the patient admitted as an inpatient following the visit? | Adverse Event                                                                                                  |
|-----------------------------------------------------------------------------------------------------|--------------------------------------------------------------------------------------------------------------------------------------------------------------------------------------------------------------------------------------------------------------------------------------|---------------------------------------------------------------|----------------------------------------------------------------------------------------------------------------|
| <input type="text"/> / <input type="text"/> / <input type="text"/><br><small>Day Month Year</small> | <input type="checkbox"/> Antibiotic <input type="checkbox"/> Analgesia <input type="checkbox"/> Larvae<br><input type="checkbox"/> Topical Treatments<br><input type="checkbox"/> Wound Management Systems<br><input type="checkbox"/> Other, please specify<br><input type="text"/> | Yes <input type="checkbox"/> No <input type="checkbox"/>      | Reported?<br>Yes <input type="checkbox"/> No <input type="checkbox"/><br><br>AE Number<br><input type="text"/> |
| <input type="text"/> / <input type="text"/> / <input type="text"/><br><small>Day Month Year</small> | <input type="checkbox"/> Antibiotic <input type="checkbox"/> Analgesia <input type="checkbox"/> Larvae<br><input type="checkbox"/> Topical Treatments<br><input type="checkbox"/> Wound Management Systems<br><input type="checkbox"/> Other, please specify<br><input type="text"/> | Yes <input type="checkbox"/> No <input type="checkbox"/>      | Reported?<br>Yes <input type="checkbox"/> No <input type="checkbox"/><br><br>AE Number<br><input type="text"/> |
| <input type="text"/> / <input type="text"/> / <input type="text"/><br><small>Day Month Year</small> | <input type="checkbox"/> Antibiotic <input type="checkbox"/> Analgesia <input type="checkbox"/> Larvae<br><input type="checkbox"/> Topical Treatments<br><input type="checkbox"/> Wound Management Systems<br><input type="checkbox"/> Other, please specify<br><input type="text"/> | Yes <input type="checkbox"/> No <input type="checkbox"/>      | Reported?<br>Yes <input type="checkbox"/> No <input type="checkbox"/><br><br>AE Number<br><input type="text"/> |
| <input type="text"/> / <input type="text"/> / <input type="text"/><br><small>Day Month Year</small> | <input type="checkbox"/> Antibiotic <input type="checkbox"/> Analgesia <input type="checkbox"/> Larvae<br><input type="checkbox"/> Topical Treatments<br><input type="checkbox"/> Wound Management Systems<br><input type="checkbox"/> Other, please specify<br><input type="text"/> | Yes <input type="checkbox"/> No <input type="checkbox"/>      | Reported?<br>Yes <input type="checkbox"/> No <input type="checkbox"/><br><br>AE Number<br><input type="text"/> |

**Please provide details of any additional visits using the SWHSI-2 Supplementary Page for A&E Visits. Please proceed to Section F.**

Participant ID:

**Section F - Hospital Transport**

During the past 12 months, has the participant required any use of hospital transport in relation to their wound?  Yes  No

If Yes, please indicate the total number of times transport has been required:

*Please proceed to Section G*

**Section G - CRF Sign Off**

|                                                                      | Yes                      | No                       |
|----------------------------------------------------------------------|--------------------------|--------------------------|
| All sections of the Investigator CRF have been completed as required | <input type="checkbox"/> | <input type="checkbox"/> |

Form Completed by:

\*Name: \_\_\_\_\_ Signature: \_\_\_\_\_

Assessor ID:  Date:  /  /   
*Day Month Year*

\*Must be reflected in the Delegation of Authority Log
