# Supplementary material
Source: PubMed Central journal article supplement (PMC8547049)
Supplement: 13063_2021_5662_MOESM14_ESM.pdf [file 13063_2021_5662_MOESM14_ESM.pdf]

## SWHSI-2 Trial

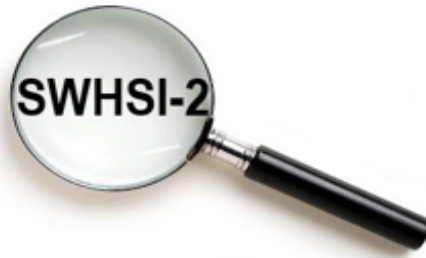

### Baseline Investigator Case Report Form

### FOR STUDY INVESTIGATOR COMPLETION

**Site ID:**

|  |  |
|--|--|
|  |  |
|--|--|

**Participant ID:**

|  |  |  |  |
|--|--|--|--|
|  |  |  |  |
|--|--|--|--|

**Assessment Date:**

|            |  |   |              |  |   |             |  |  |  |
|------------|--|---|--------------|--|---|-------------|--|--|--|
|            |  | / |              |  | / |             |  |  |  |
| <i>day</i> |  |   | <i>month</i> |  |   | <i>year</i> |  |  |  |

This project is funded by the National Institute for Health Research Health Technology Assessment Programme (Project number 17/42/94)

**Section A – Patient Eligibility and Consent Check**

Please complete the checklist below to confirm patient eligibility and consent form completion before proceeding to complete this case report form (CRF).

Note: Informed consent must be obtained prior to any trial procedures being undertaken, including completion of any section of this form.

1. Have all the inclusion criteria been met?  Yes  No
2. Are any of the exclusion criteria present?  Yes  No
3. Has the patient provided written informed consent?  Yes  No

If the patient is eligible and consent has been provided, please read the instructions for completing this CRF:

This CRF may be completed by the principal investigator or a delegated member of staff listed on the SWHSI-2 Trial Delegation Log.

Please refer to the associated SWHSI-2 Trial Specific Procedure for full details of how to complete this CRF.

Please complete all sections of this questionnaire using the spaces provided, and sign off when complete.

Please do not include any patient identifiable information when completing this CRF. When complete, please remove the staple and take a photocopy of the completed CRF for your site records. **Please do not re-staple the original.** Place the unstapled original in a “SWHSI-2 Trial business reply envelope” and send via post to York Trials Unit.

*Please proceed to Section B*

Participant ID:

**Section B – Patient demographics**

1. Date of Birth   /   /      
*day month year*

2. Gender  Male  Female

3. Ethnicity *(please cross one box only)*

White  Mixed race  Asian or Asian British

Black or Black British  Chinese

Other ethnicity, please specify:

4. Smoking status

• Tobacco  Never  Current  Previous

• E-cigarette  Never  Current  Previous

5. Alcohol intake:  Yes  No

If 'Yes' Average Units per week:    units

*Please proceed to Section C*

Participant ID:

### **Section C – Comorbidities**

Does the patient currently have any of the following co-morbidities?  Yes  No

If 'Yes', please complete Questions 1 to 6. If 'No', please proceed to Section D.

1. Cardiovascular disease:  Yes  No

If 'Yes' please specify:

Hypertension  Myocardial Infarction  Angina  Heart Failure

Other, please specify:

2. Peripheral Vascular Disease:  Yes  No

If 'Yes' please specify:

Asymptomatic  Claudication  Rest Pain  Tissue Loss  Aneurysm

Vasculitis  Other, please specify:

3. Diabetes:  Yes  No

If 'Yes' is this controlled by:

Insulin  Tablet  Diet

4. Respiratory conditions:  Yes  No

5. Neurological conditions:  Yes  No

If 'Yes' please specify:

Parkinson's Disease  Multiple Sclerosis  Epilepsy  Spinal injury

Other, please specify:

6. Stroke:  Yes  No

*Please proceed to Section D*

Participant ID:

**Section D – Concomitant Medications**

Is the patient currently receiving any of the following medications?  Yes  No

If 'Yes', provide a response for all listed below. If 'No', please proceed to Section E.

- Cytotoxic  Yes  No
- NSAID  Yes  No
- Anti-coagulant  Yes  No
- Antiplatelet  Yes  No
- Corticosteroid  Yes  No
- Immunosuppressant  Yes  No
- Vasodilator  Yes  No
- Analgesia  Yes  No

If 'Yes', please indicate the type and reason:

IV  Oral  Other:

Related to SWHSI  Other reason:

Antibiotic  Yes  No

If 'Yes', please indicate the type and reason:

IV  Oral  Other:

Related to SWHSI  Other reason:

*Please proceed to Section E*

**Section E – Body Mass Index Measurements**

Please record the patients:

Height:    cm

Weight:    .   Kgs

*Please proceed to Section F*

**Section F – Surgery Details**

1. Please record the type of surgery that led to this SWHSI:

 Vascular  Colorectal  Plastics Other (please specify): 

2. Please record the date of the surgery that led to the SWHSI:

 /  /   
day month year

3. Was the surgery:

 Elective  Emergency

4. Please record the name of the surgery:

 Laparotomy with bowel resections Laparotomy without bowel resections Excision of pilonidal sinus Hernia repair Minor lower limb amputation Major lower limb amputation Cholecystectomy Hysterectomy Caesarean Section Excisions of skin lesions Surgical debridement of necrotic tissue Incision and drainage of abscess (including related to diabetic foot) Other (please specify): 

5. The contamination level of surgery was:

 Clean (i.e. uninfected wound with no inflammation, and where respiratory, alimentary, genital or urinary tracts are not entered) Clean Contaminated (i.e. wound in which respiratory, alimentary, genital or urinary tracts are entered under controlled conditions and without contamination) Contaminated (i.e. open, fresh or accidental wounds, operations where a major break in sterile technique or gross spillage from intestinal tract, or where acute non-purulent inflammation is present) Dirty (i.e. wound with devitalised tissue, clinical infection or perforated viscera)

6. Did the surgery involve a surgical implant?

 Yes  No

If 'Yes', please provide details:

 Mesh  Prosthesis  Stent Other (please specify): *Please proceed to Section G*

**Section G – SWHSI Assessment**

1. How many SWHSI does this patient have?

 1 2 3 4 5 6+

*If the patient has more than one SWHSI, the largest wound will be defined as the reference SWHSI.*

2. Does this patient have a previous history of SWHSI?

 Yes No3. The SWHSI arose because *(please select all that apply)*: The wound edges could not be approximated Of presence of infection/contamination Planned to heal by secondary intention for other reasons, please specify: Wound dehiscenced along its entire length. If 'Yes', please provide the date this occurred: /  /   
day month year Wound dehiscenced along part of its length. If 'Yes', please provide the date this occurred: /  /   
day month year Previously closed wound surgically opened. If 'Yes', please provide the date this occurred: /  /   
day month year

4. In your clinical opinion is the SWHSI currently infected?

 Yes No

If 'Yes', please indicate which features are present. If 'No', please proceed to Question 5.

 Abscess or other evidence of infection (found during re-operation, by radiology or histopath examination) Aspirated fluid swab yields organisms and pus cells are present Antibiotics prescribed for infection Incision spontaneously dehiscences or was opened by a surgeon Clinician diagnosis Purulent drainage Fever Heat Localised swelling Localised pain and tenderness Redness

Participant ID:

5. Please record if the wound has any of the following features:

Odour  Yes  No

Slough  Yes  No

Necrosis  Yes  No

Granulation Tissue  Yes  No

Exudate  Yes  No

If 'Yes', please indicate if this is:  Low  Medium  High

Other (please specify):  Yes  No

6. Please grade the SWHSI in terms of tissue involvement: *(please select all that apply)*

Full thickness skin loss

Subcutaneous tissue exposed

Underlying muscle exposed

Underlying tendons exposed

Underlying bone exposed

Underlying organs exposed

Tissue involvement unclear due to undermining or devitalised tissue

Other (please specify):

7. Please record the wound size:

Wound Length:  .  cm

Wound Width:  .  cm

Wound Area:  .  cm<sup>2</sup>

8. If the patient's wound is located on their foot, please indicate the patients status relating to the following features:

Pedal blood flow:  Intact  Reduced

Neuropathy:  Protective sensation intact  Protective sensation reduced

Protective sensation absent

*Please proceed to Section H*



**Section H – SWHSI Treatments**

1. Where is the patient currently receiving treatment for their SWHSI?

 Hospital Outpatient Department Hospital Ward Community Hospital Intermediate Care Facility Podiatry Clinic GP Practice Own Home Another's Home Nursing Home Community Clinic Other (please specify):2. Who is primarily responsible for the patient's care? *(please select one option only)* Hospital doctor General Practitioner Ward Nurse Tissue Viability Nurse Practice Nurse District Nurse Other (please specify):

3. Is the patient is currently receiving dressings for their SWHSI?

 Yes No

If 'Yes', please provide details of the dressings used:

 Alginate Basic wound contact Cavity Foam Foam Gauze Ribbon Hydrocolloid Hydrogel Hydrofoam/Spun Hydrocolloid Honey Iodine Containing PHMB Protease Modulating matrix Silver containing Flamazine silver sulfadiazine dressing Urgotol silver sulfadiazine dressing Soft polymer Superabsorbent Vapour permeable film or membrane Negative Pressure Wound Therapy\**\*Note patient should not be randomised if already receiving NPWT for their SWHSI* Other (please specify): Other (please specify): Other (please specify):

Participant ID:

4. Is the patient receiving any other treatment for their SWHSI (excluding antibiotics and analgesia reported in Section D)?  Yes  No

If 'Yes', please provide details of the treatments used:

- Wound Management Systems  Emollient  Silver Nitrate Stick  
 Dietetic Input  Larvae

Other (please specify):

Other (please specify):

Other (please specify):

*Please proceed to Section I*

**Section I – Checklist and CRF Sign Off**

1. All Sections of the Investigator CRF are complete  Yes  No  
2. All Sections of the Participant CRF are complete  Yes  No  
3. Wound measurements have been completed  Yes  No  
4. Wound photograph has been taken  Yes  No

If 'No', please indicate why a photograph was not obtained:

**Form Completed by:**

\*Name:

Signature:

Assessor ID:

Date:  /  /   
*day month year*

\*Must be reflected in the Delegation of Duties Log

*Please proceed to Section J*

Participant ID:

**Section J – Randomisation**

Date of Randomisation:

/  /   
*day month year*

Randomised to receive:

NPWT                       Usual Care
