# Supplementary material
Source: PubMed Central journal article supplement (PMC8547049)
Supplement: 13063_2021_5662_MOESM17_ESM.pdf [file 13063_2021_5662_MOESM17_ESM.pdf]

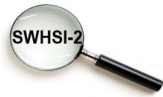

### SWHSI-2 Blinded Outcome Assessment CRF

Participant ID:

Date of Blinded Assessment:  /  /   
day month year

Assessment completed by:  LW  AO  NS  Other, please specify

Please complete both Questions 1 and 2 when reviewing SWHSI-2 Photographs.

1. Do the photographs taken for this participant confirm reference wound healing?  
(Please select one option)

**Yes**

**No** If 'No', please provide information regarding why you suggest this wound is not healed:

**Unsure** If 'Unsure', please indicate reasons for uncertainty:

Photograph is blurred or out of focus

Wound is not fully visible in photograph

Photograph taken too far away from wound

Photograph is too dark

Other, please specify:

Other, please specify:

Do you have any notes or comments, including other reasons for uncertainty?

Yes  No

If 'Yes', please provided these below:

2. Do you think that you know what treatment the participant received?

**Yes**  **No**

If 'Yes', please indicate the treatment you believe the participant received:

Intervention – Negative Pressure Wound Therapy

Usual Care – Wound Dressings
